# Supplementary material for: Solvent-free click chemistry for tetrazole synthesis from 1,8-diazabicyclo[5.4.0]undec-7-ene (DBU)-Based fluorinated ionic liquids, their micellization, and density functional theory studies
Source: Royal Society of Chemistry journal article supplement (doi:10.1039/c4ra13393e), 2014-01-01

Supplementary Information (SI)

## **Solvent-Free Click Chemistry for Tetrazole Synthesis from 1,8-diazabicyclo[5.4.0]undec-7-ene (DBU)-Based Fluorinated Ionic Liquids, their Micellization, and Density Functional Theory Studies**

Abdul Hameed\*\*<sup>a</sup>, Syed Abid Ali<sup>a</sup>, Ali Anus Khan<sup>a</sup>, Syed Tarique Moin<sup>a</sup>, Khalid Mohammed Khan<sup>a</sup>, Jamshed Hashim<sup>a</sup>, Fatima Zahra Basha<sup>a</sup>, Muhammad Imran Malik\*<sup>a</sup>

<sup>a</sup> H. E. J. Research Institute of Chemistry, International Center for Chemical and Biological Sciences, University of Karachi, Karachi-75270, Pakistan

Corresponding author:

\*\* A.H., Tel.: +92-219-9261701-2; Fax: +92-213-4819018

Email: [abdul.hameed@iccs.edu](mailto:abdul.hameed@iccs.edu) / [abdul\\_hameed8@hotmail.com](mailto:abdul_hameed8@hotmail.com)

\* M.I.M., Email: [m.imran.malik1@gmail.com](mailto:m.imran.malik1@gmail.com) / [mimran.malik@iccs.edu](mailto:mimran.malik@iccs.edu)

### **Spectral Data**

ALI ANUS/DR, FATIMA .B/DBU/ICCBS, U.O.K/  
<sup>1</sup>H

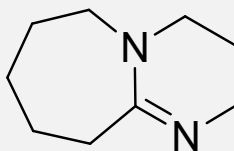

**DBU**  
**(1,8-diazabicyclo[5.4.0]undec-7-ene)**

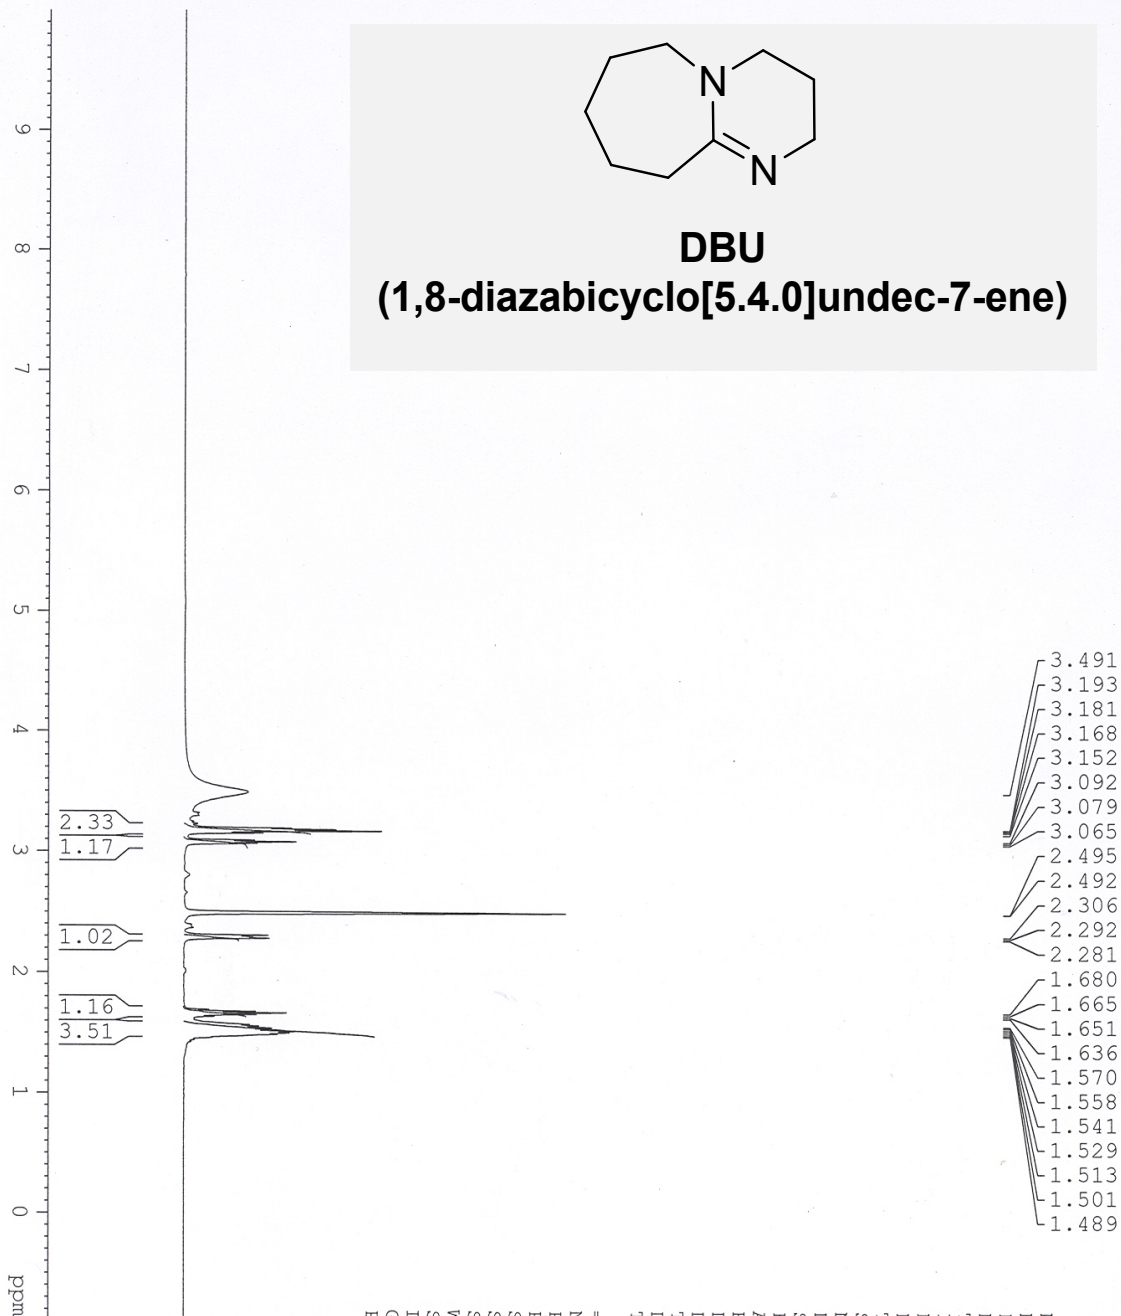

- 3.491
- 3.193
- 3.181
- 3.168
- 3.152
- 3.092
- 3.079
- 3.065
- 2.495
- 2.492
- 2.306
- 2.292
- 2.281
- 1.680
- 1.665
- 1.651
- 1.636
- 1.570
- 1.558
- 1.541
- 1.529
- 1.513
- 1.501
- 1.489

AVANCE 400  
 LAB NO 117

```

NAME          mar19-14
EXPNO         3
PROCNO        1
Date_         20140319
Time_         11.18
INSTRUM       5 mm DUL
PROBHD        13C-1
PULPROG       zg30
TD            32768
SOLVENT       DMSO
NS            64
DS            0
SWH           8012.820 Hz
FIDRES       0.244532 Hz
AQ           2.0447731 sec
RG           2048
DW           62.400 usec
DE           6.50 usec
TE           300.0 K
D1           2.000000000 sec
TD0          1

===== CHANNEL f1 =====
NUC1          1H
P1           10.20 usec
PL1          0.00 dB
SFO1         400.1332010 MHz
SI           16384
SF           400.1300064 MHz
WDW          EM
SSB          0
LB           0.30 Hz
GB           0
PC           1.00
    
```

Supplementary Information (SI)

ALI ANUS/DR, FATIMA .B/DBU/ICCBS, U.O.K/  
<sup>1</sup>H

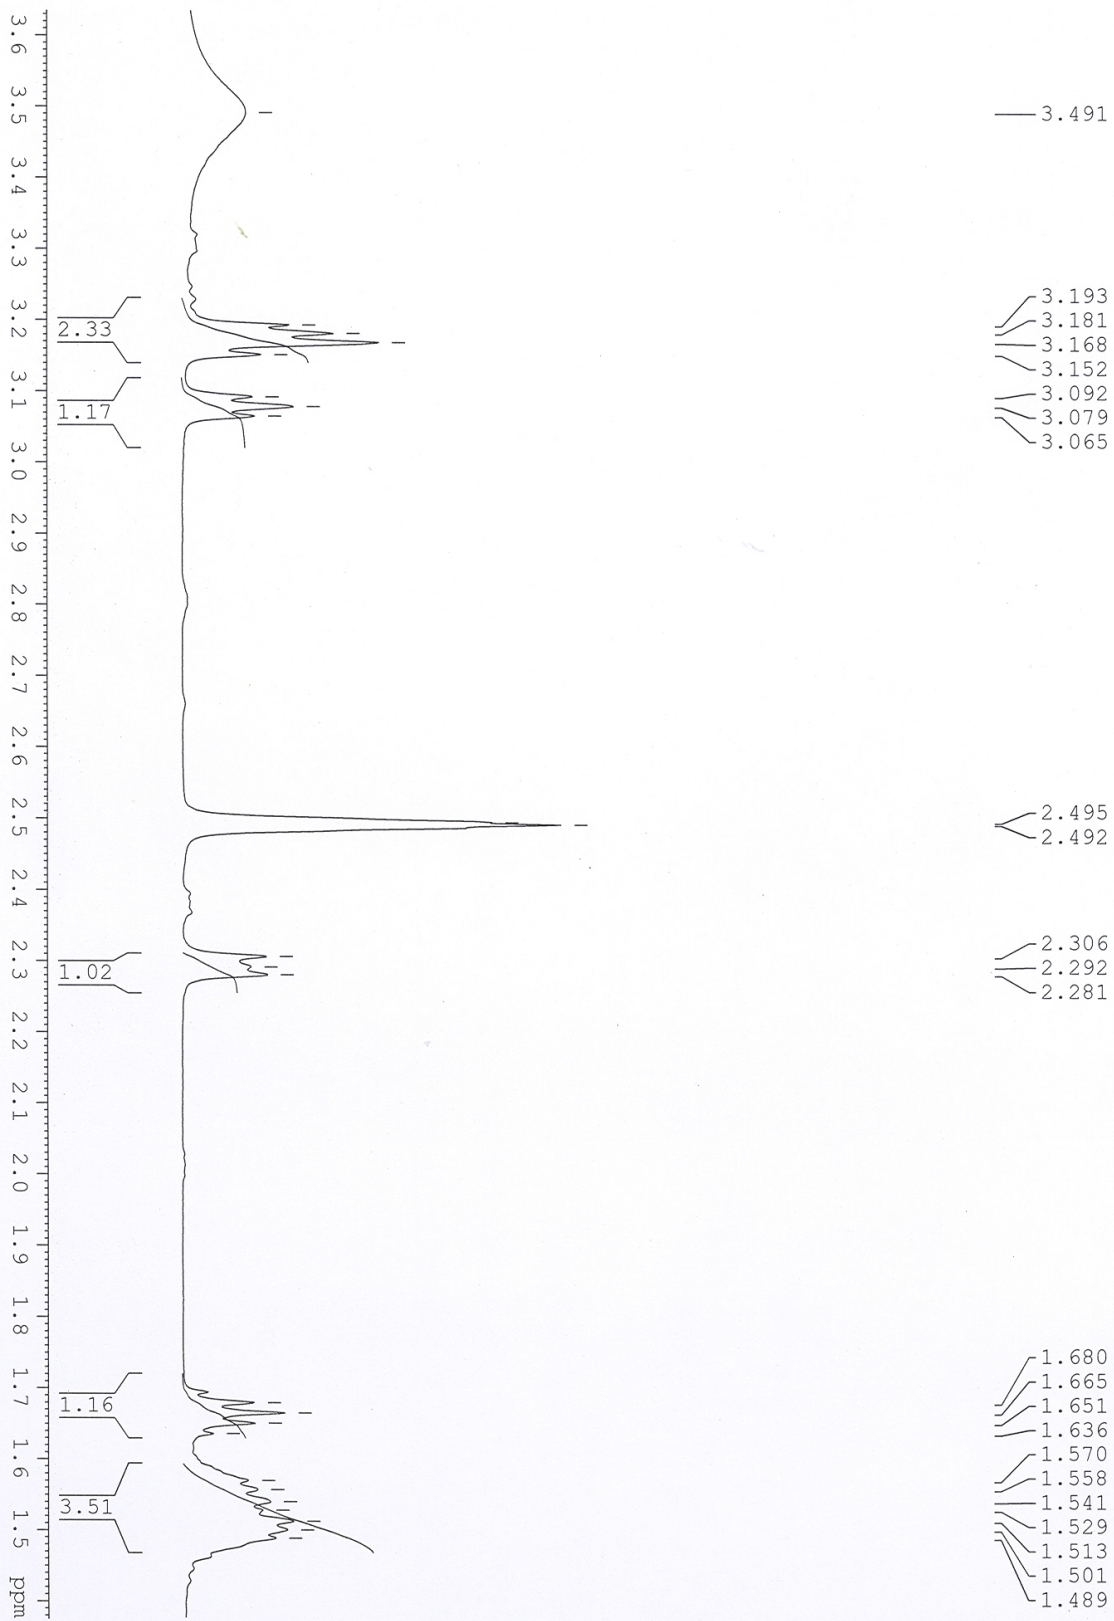



ALI ANUS/DR, FATIMA B/AA-23/ICCBS. U.O.K/

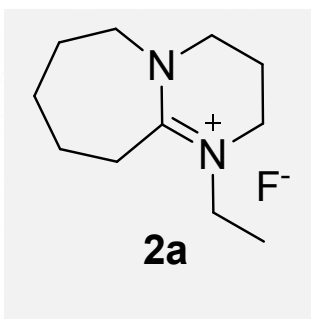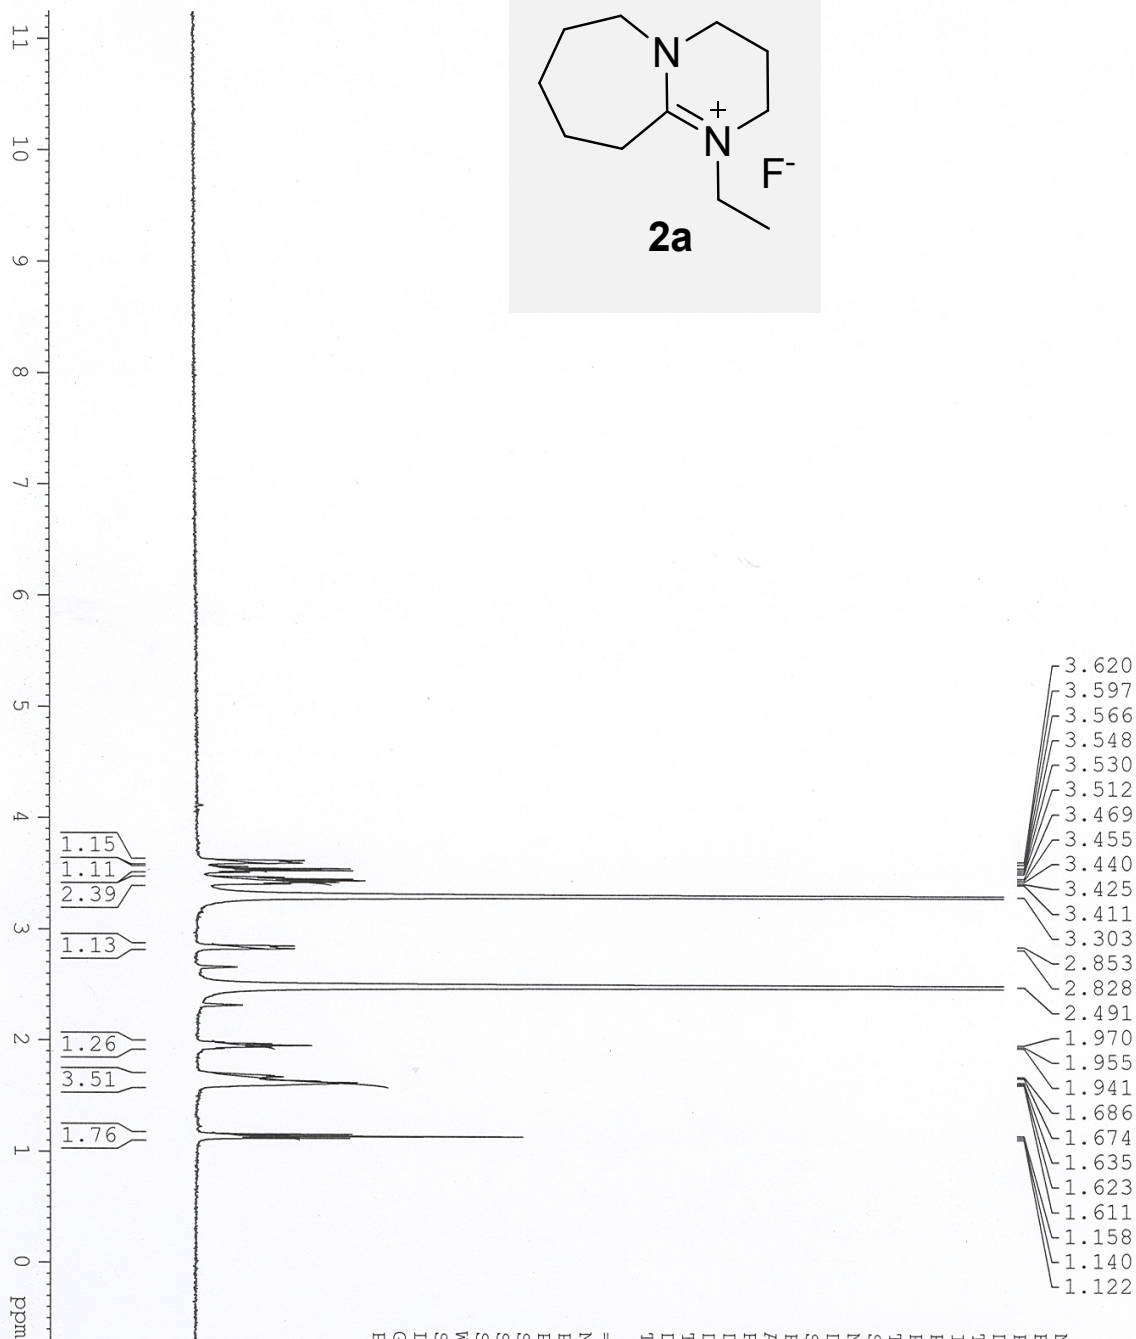

AVANCE 400  
LAB NO 117

```

NAME          mar13-14
EXPNO         2
PROCNO        1
Date_         20140313
Time_         8.39
INSTRUM       spect
PROBHD        5 mm DUL 13C-1
PULPROG       zg30
TD            32768
SOLVENT       DMSO
NS            64
DS            0
SMH           8012.820 Hz
FIDRES        0.244532 Hz
AQ            2.0447731 sec
RG            2048
DE            62.400 usec
TE            300.0 K
D1            2.00000000 sec
TD0           1

===== CHANNEL f1 =====
NUC1          1H
P1            10.20 usec
PL1           0.00 dB
SFO1          400.1332010 MHz
SI            16384
SF            400.1300063 MHz
WDW           EM
SSB           0
LB            0.30 Hz
GB            0
PC            1.00
    
```



Supplementary Information (SI)

ALI ANUS/DR, FATIMA B/AA-23/ICCBS.U.O.K/

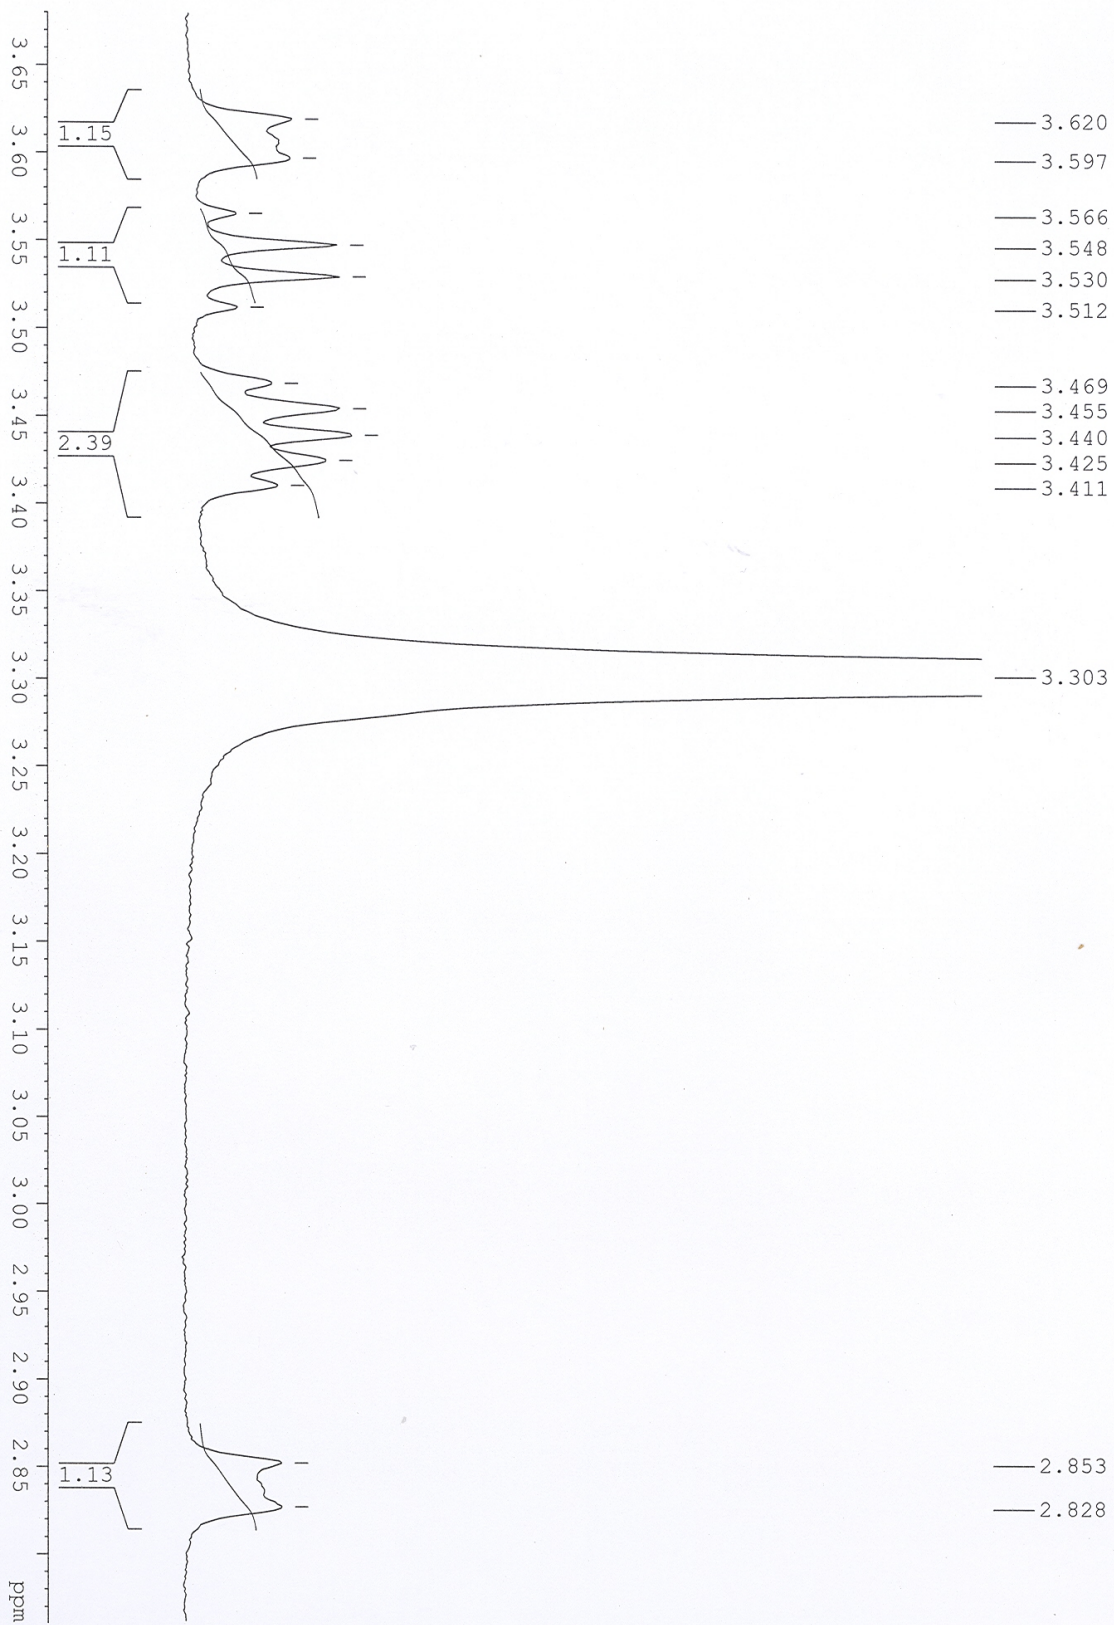

Supplementary Information (SI)

ALI ANUS/DR, FATIMA B/AA-23/ICCBS. U.O.K/

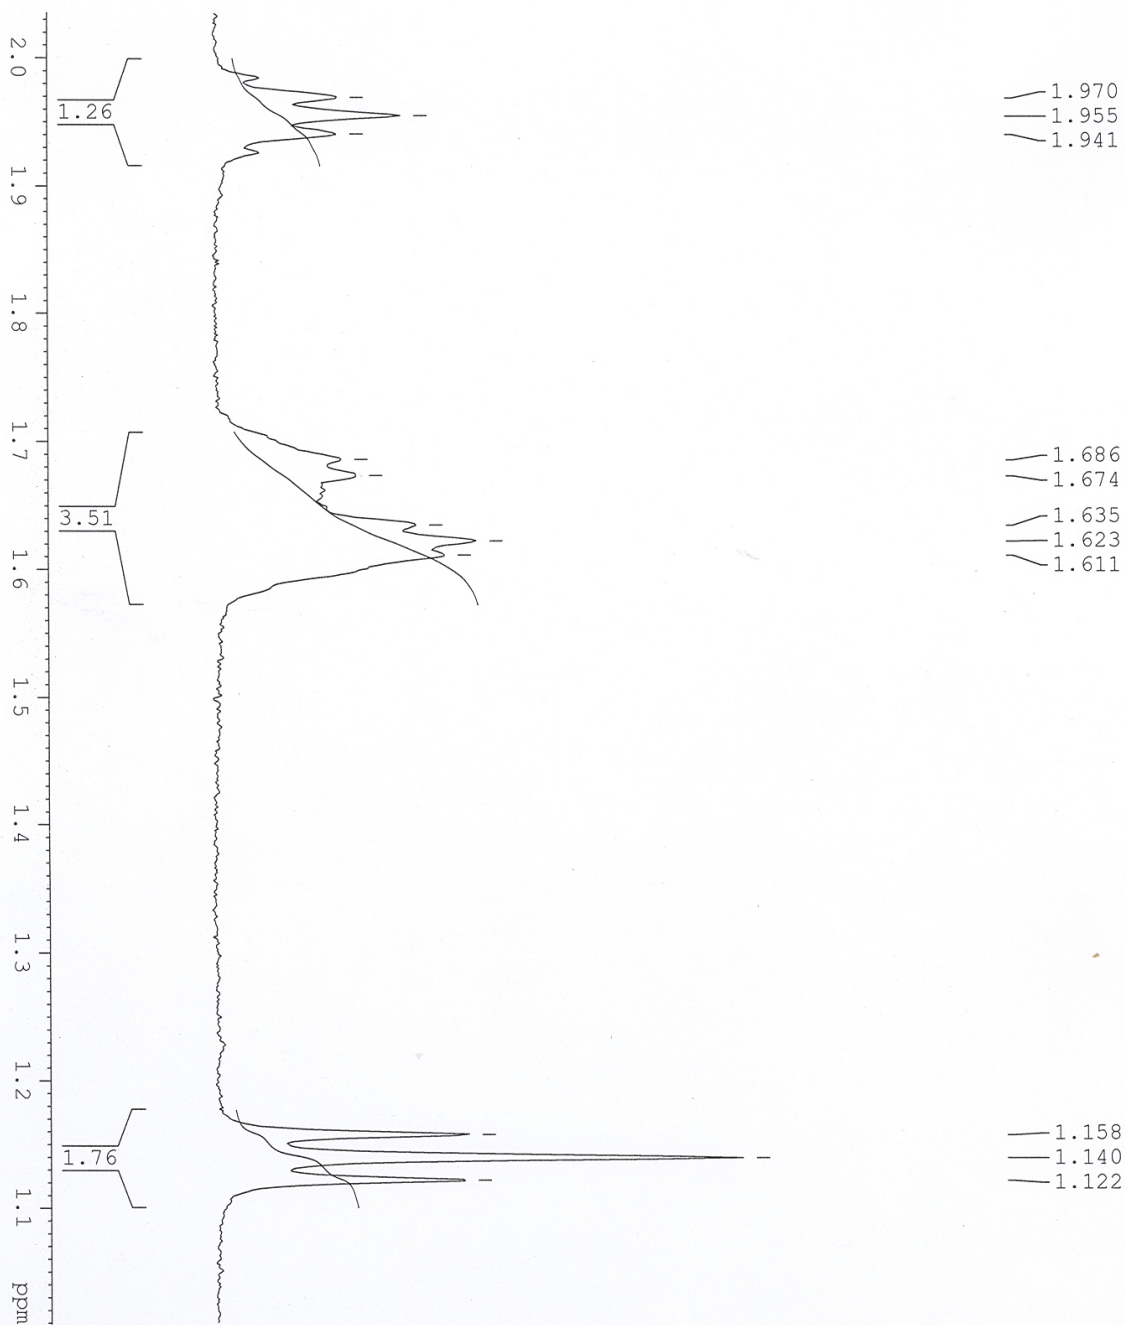



Supplementary Information (SI)

Sample : 1\ Ali Anus  
Measured : 18/07/2014 on VECTOR22  
Resolution : 4 cm<sup>-1</sup> ( 10 scans )  
Spectrum : 1.5 ( in D:\RSTUDENT )  
Technic : SOLID  
Qualifyst : ZURBIR/JANSHED

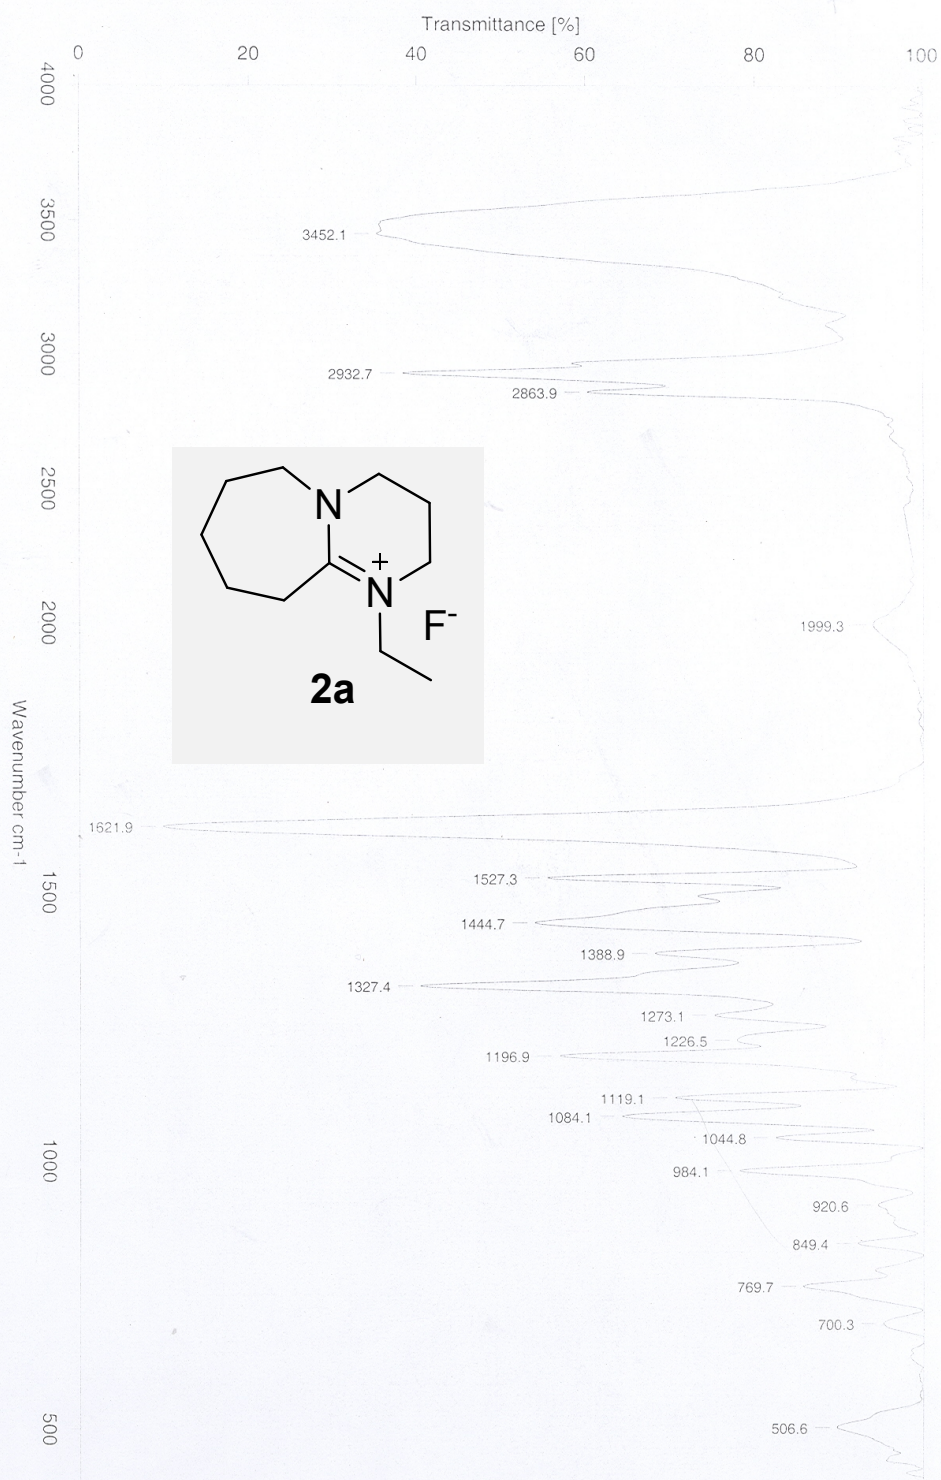



ALI ANUS/DR, FATIMA B/AA-25A/ICCBS.U.O.K/

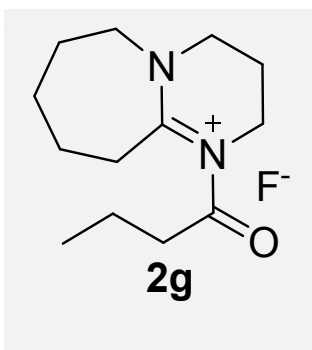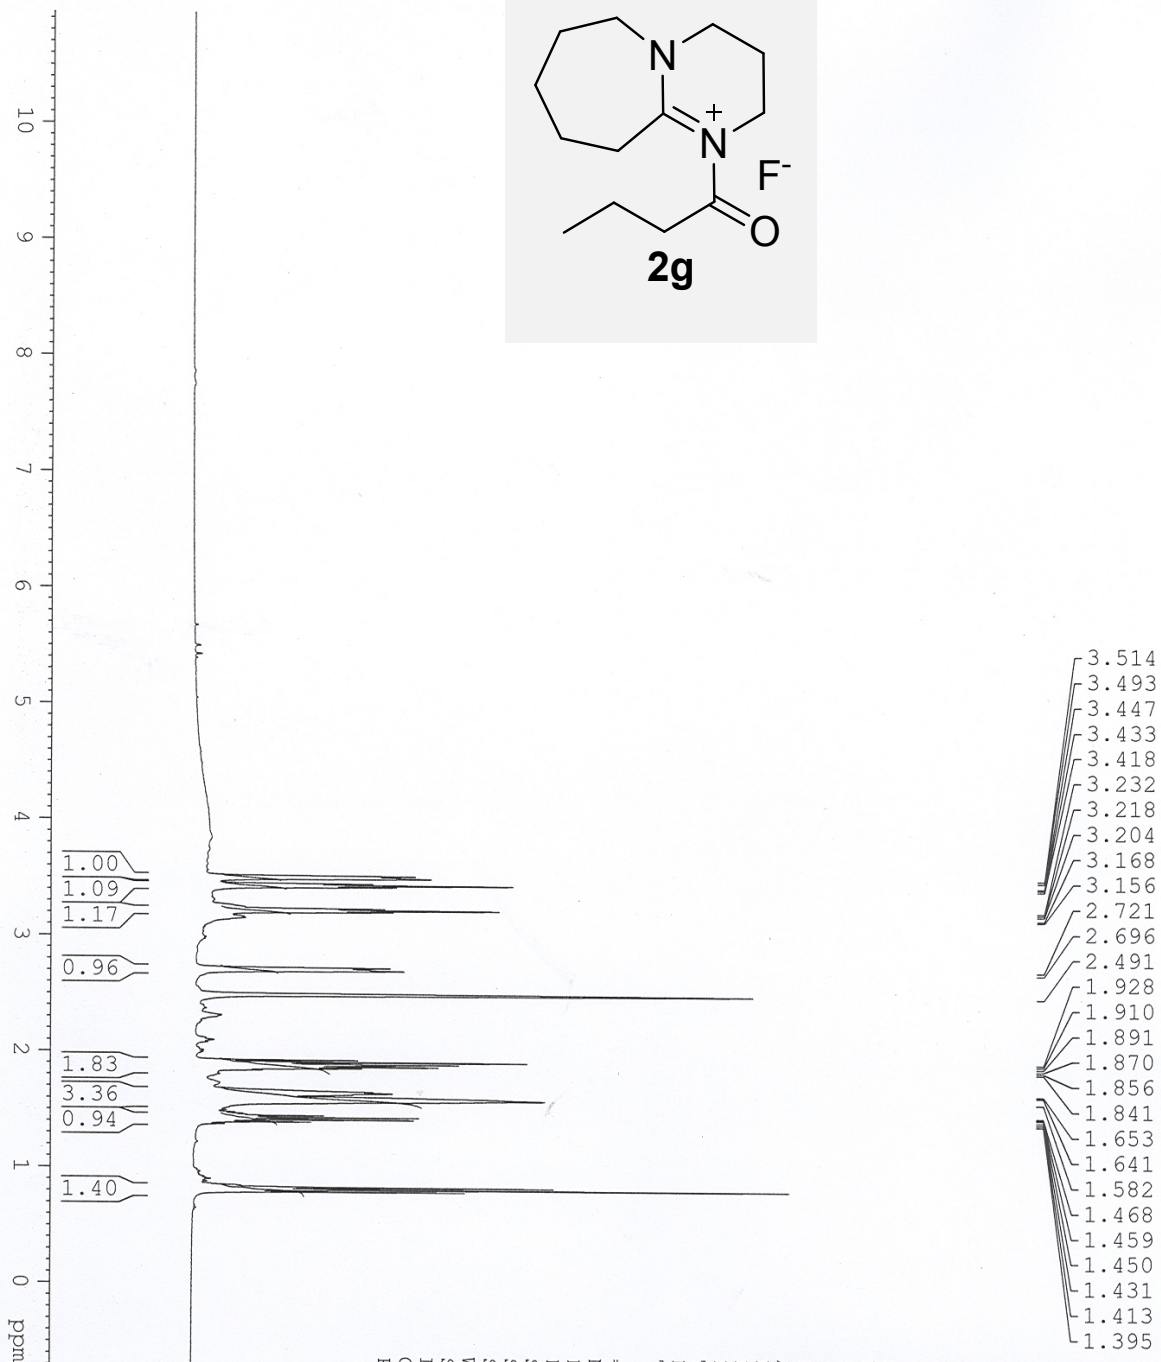

AVANCE 400  
LAB NO 117

```

NAME          mar13-14
EXPNO         1
PROCNO        1
Date_         20140313
Time          8.28
INSTRUM       5 mm DUL 13C-1
PROBHD        zg30
PULPROG       32768
TD            DMSO
SOLVENT       DMSO
NS            32
DS            0
SWH           8012.820 Hz
FIDRES       0.244532 Hz
AQ           2.0447731 sec
RG           2048
DW           62.400 usec
DE           6.50 usec
TE           300.0 K
D1           2.000000000 sec
TD0          1

===== CHANNEL f1 =====
NUC1          1H
P1           10.20 usec
PL1          0.00 dB
SF01         400.1332010 MHz
SI           16384
SE           400.1300063 MHz
WDW          EM
SSB          0
LB           0.30 Hz
GB           0
PC           1.00
    
```

Supplementary Information (SI)

ALI ANUS/DR, FATIMA B/AA-25A/ICCBS. U. O. K/

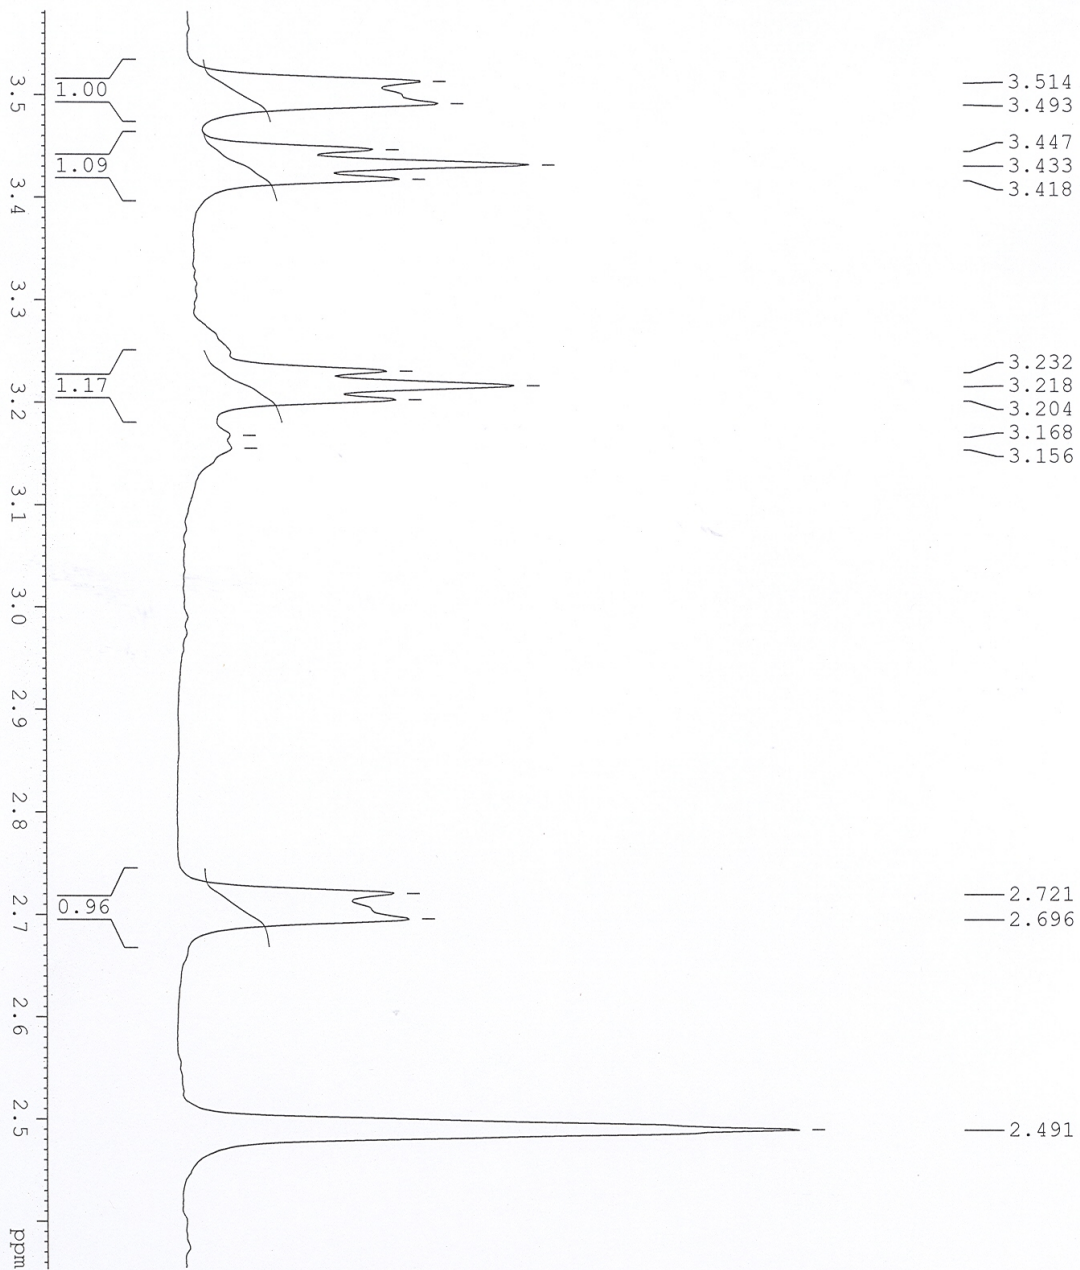



Supplementary Information (SI)

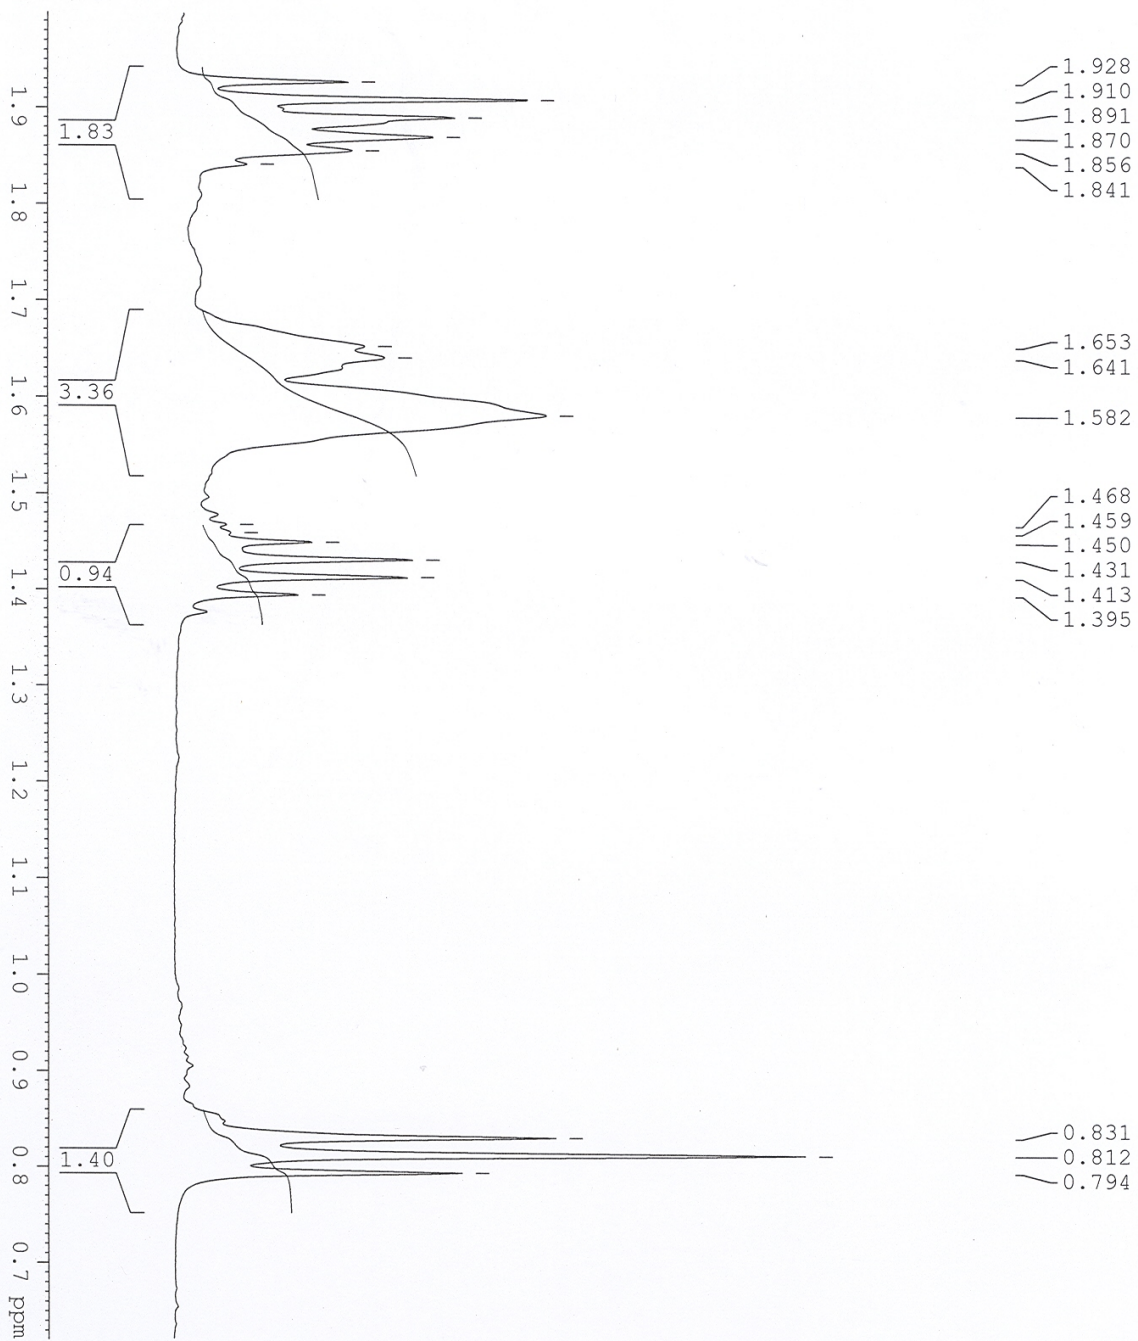

ALI ANUS/DR, FATIMA B/AA-25A/ICCBS. U.O.K/



ALI ANUS/DR.A.HAMEED/AA-23/DMSO  
COSY

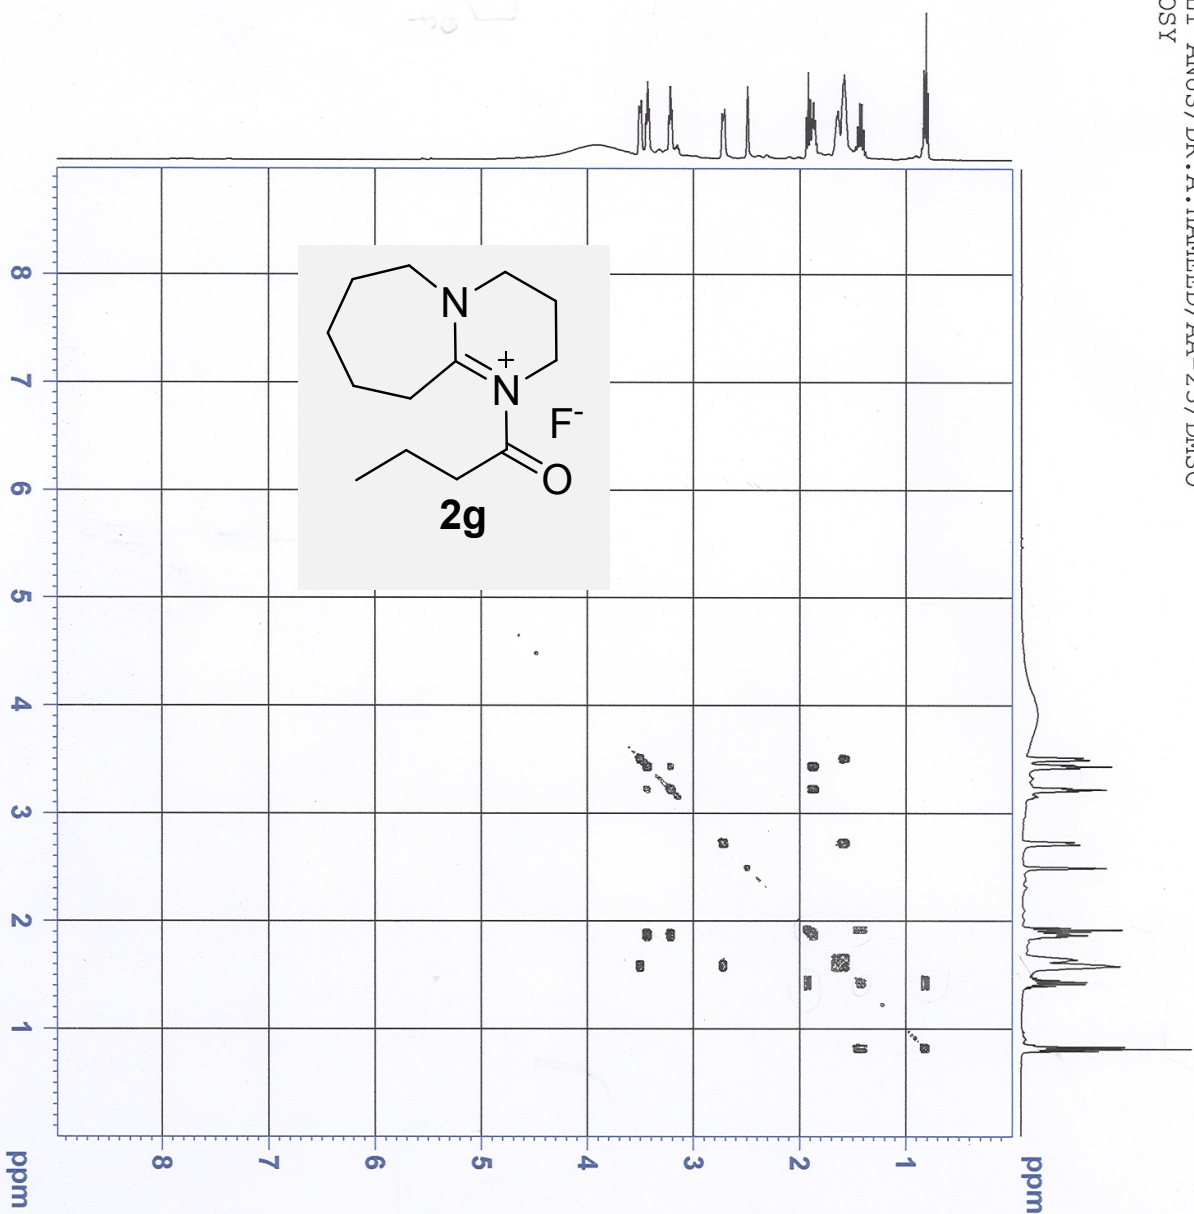

AVANCE AV-400 MHz  
Lab # 115

```

NAME          July02-14
EXPNO         7
PROCNO       1
Date_        20140702
Time         13.31
INSTRUM      spect
PROBHD       5 mm SEI 1H-13
PULPROG      cosyppdf
TD           2048
SOLVENT      DMSO
NS           32
DS           8
SMH          3591.954 Hz
FIDRES       1.753884 Hz
AQ           0.2851316 sec
RG           90.5
DM           139.200 usec
DE           6.50 usec
TE           301.5 K
DO           0.00000300 sec
D1           1.50000000 sec
D13          0.00000400 sec
D16          0.00010000 sec
INO          0.00027840 sec

===== CHANNEL f1 =====
NUC1          1H
P0            10.80 usec
P1            10.80 usec
PL1           3.00 dB
SFO1         400.0318001 MHz

===== GRADIENT CHANNEL =====
GPNAM1       SINE.100
GPZ1         10.00 %
P16          1000.00 usec
NDO          1
TD           1
SFO1         400.0318 MHz
FIDRES       14.031071 Hz
SW           8.979 ppm
FnmODE       QF
SI           1024
SE           400.0300041 MHz
WDW          QSINE
SSB          0
LB           0.00 Hz
GB           0
PC           4.00
SI           1024
MC2          QF
SF           400.0300041 MHz
WDW          QSINE
SSB          0
LB           0.00 Hz
GB           0
    
```

ALI ANUS/DR.A.HAMEED/AA-23/DMSO  
COSY

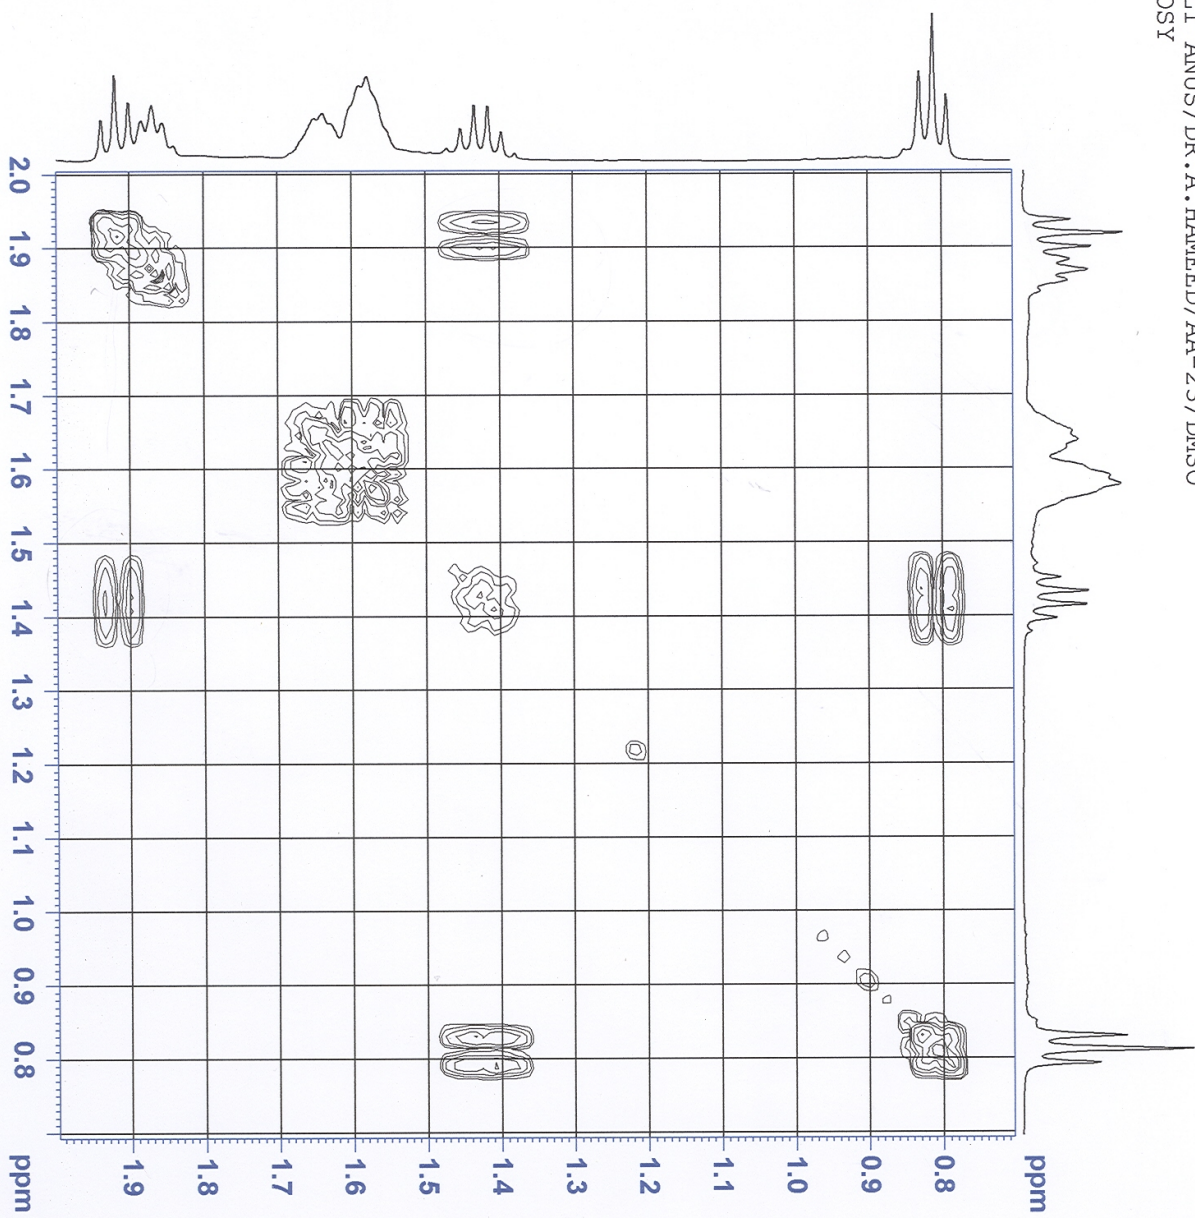



ALI ANUS / DR. A. HAMEED / AA-23 / DMSO  
COSY

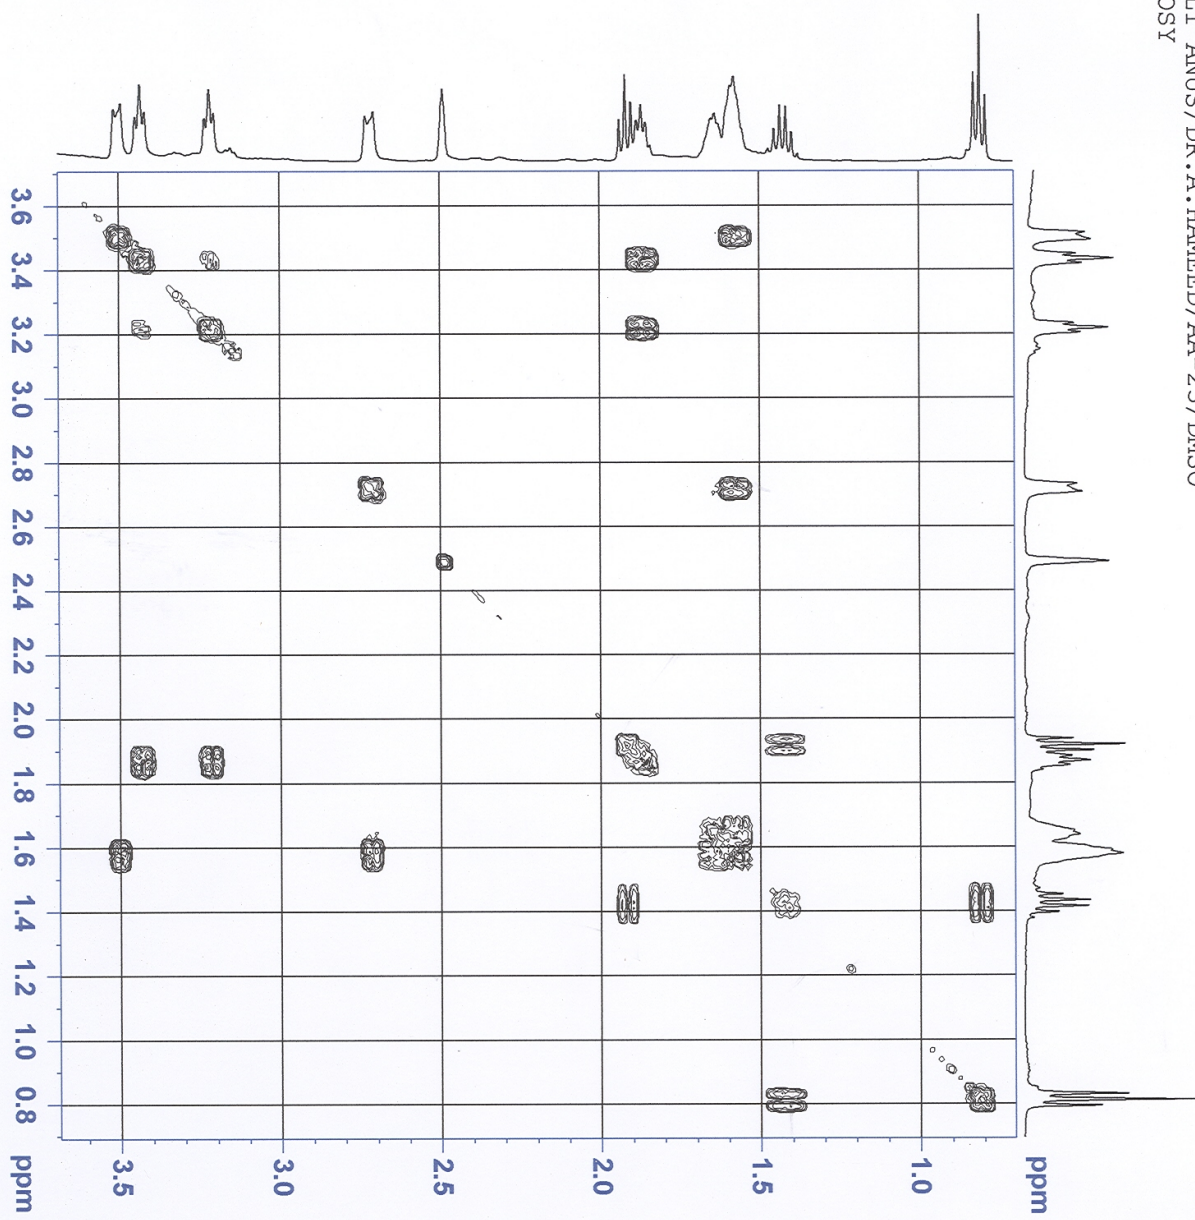



Supplementary Information (SI)

Sample : 4/ALI Anus  
Measured : 24/07/2014 on VECTOR22  
Resolution : 4 cm<sup>-1</sup> ( 10 scans )

Spectrum : 4:6 (in D:\FRSTUDENT)  
Technic : SOLID  
Analyst : ZAR/JAM

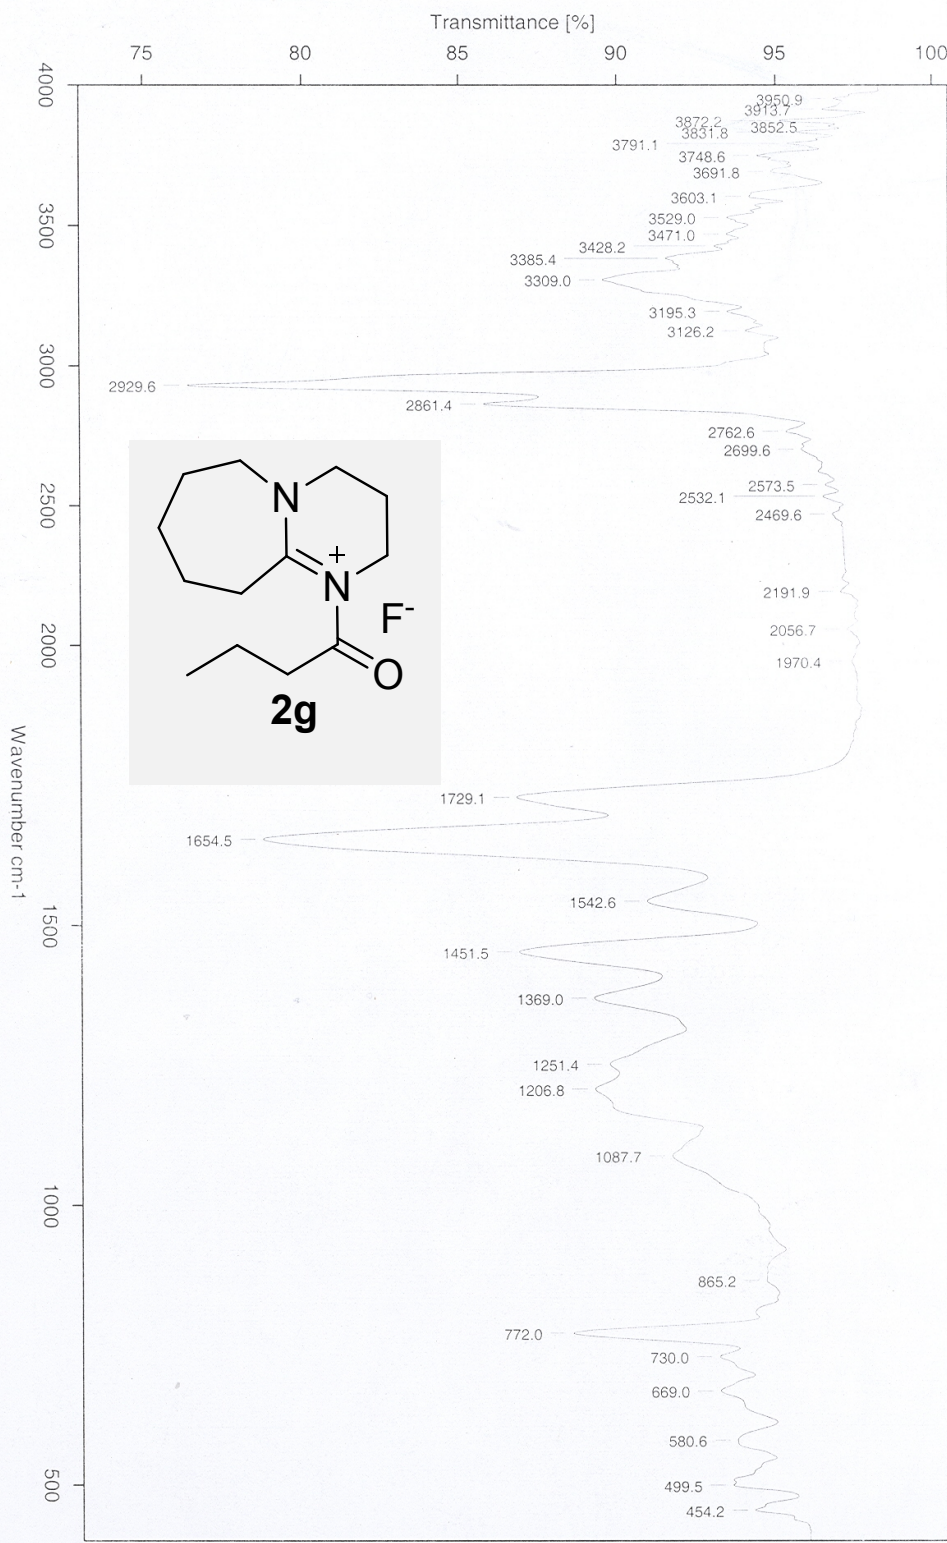

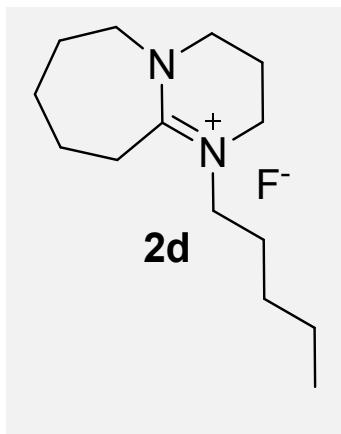

3.622  
3.600  
3.498  
3.477  
3.460  
3.446  
3.434  
3.420  
3.344  
2.857  
2.833  
2.490  
1.977  
1.963  
1.948  
1.934  
1.919  
1.678  
1.666  
1.655  
1.612  
1.546  
1.528  
1.510  
1.331

TAZEEN/DR. A. HAMED/DBD-C5-F/DMSO  
1H

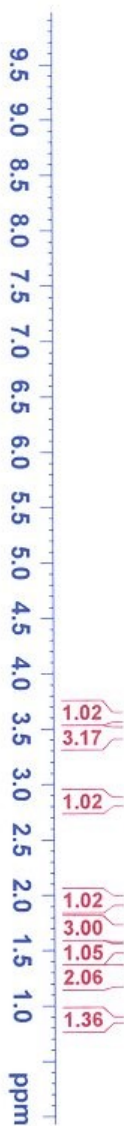

AVANCE AV-400 MHZ  
Lab # 115

```

NAME      oct28-14
EXPNO     8
PROCNO    1
Date_     20141028
Time      10.52
INSTRUM   spect
PROBHD    5 mm SEI 1H-13
PULPROG   zg30
TD        32768
SOLVENT   DMSO
NS        32
DS        0
SMH       8012.820 Hz
FIDRES    0.244532 Hz
AQ        2.0447731 sec
RG        71.8
DM        62.400 usec
DE        6.50 usec
TE        300.0 K
D1        2.00000000 sec
TD0       1

===== CHANNEL f1 =====
NUC1      1H
P1        10.80 usec
PL1       3.00 dB
SFO1      400.0332002 MHz
SI        16384
SF        400.0300041 MHz
WDW       EM
SSB       0
LB        0.30 Hz
GB        0
PC        1.00
    
```

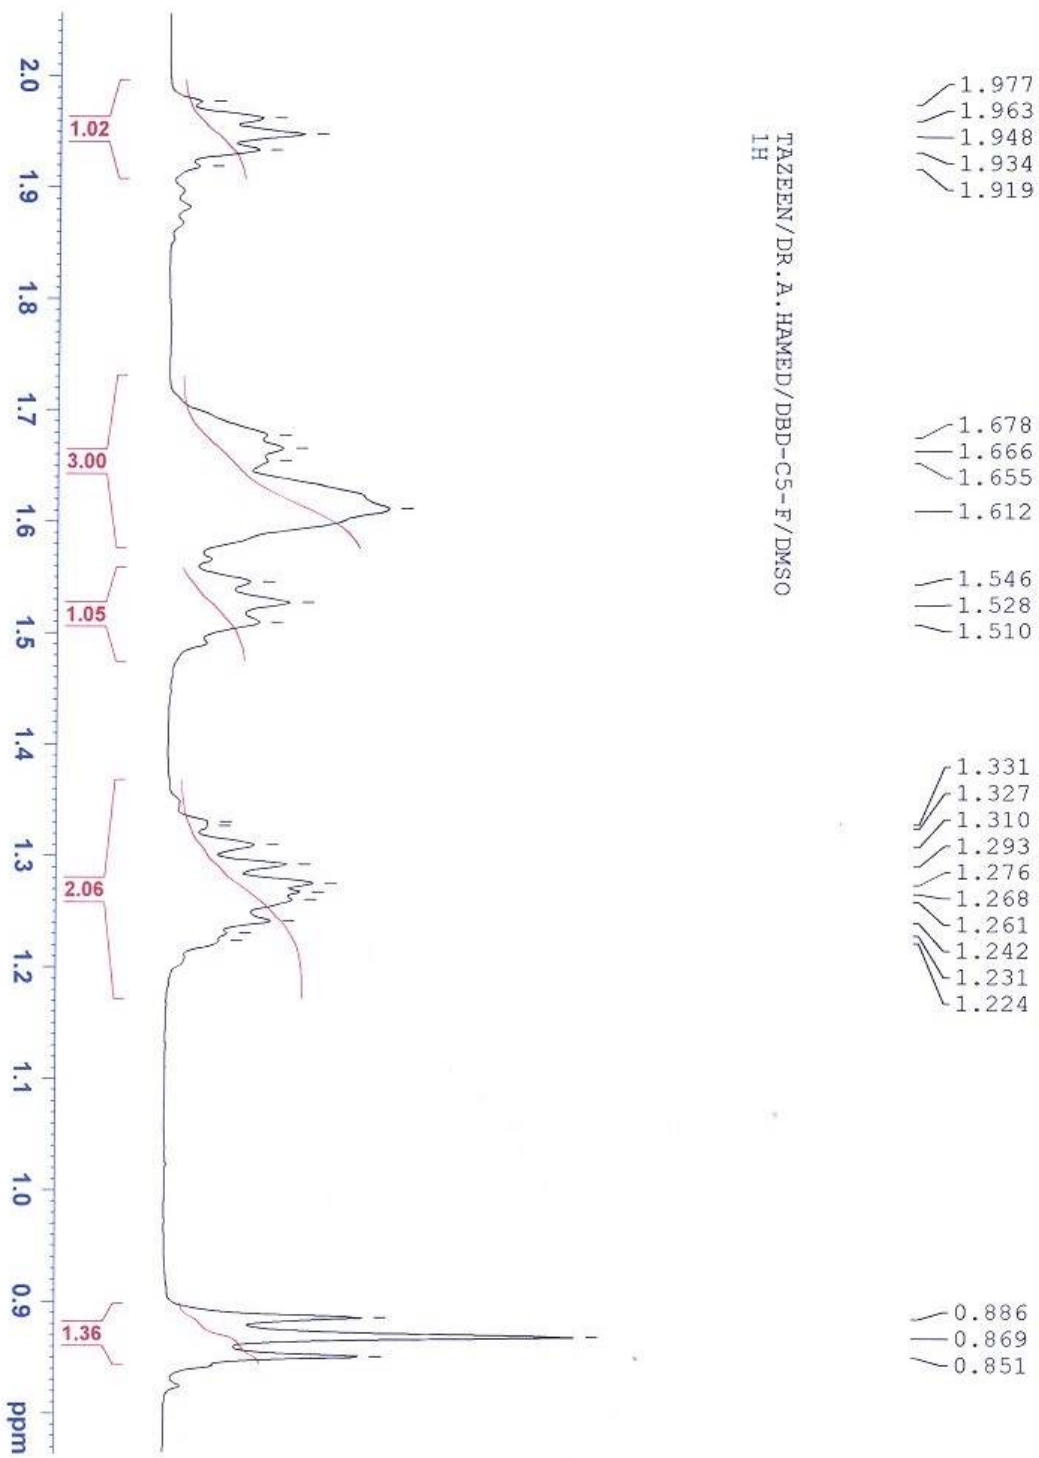



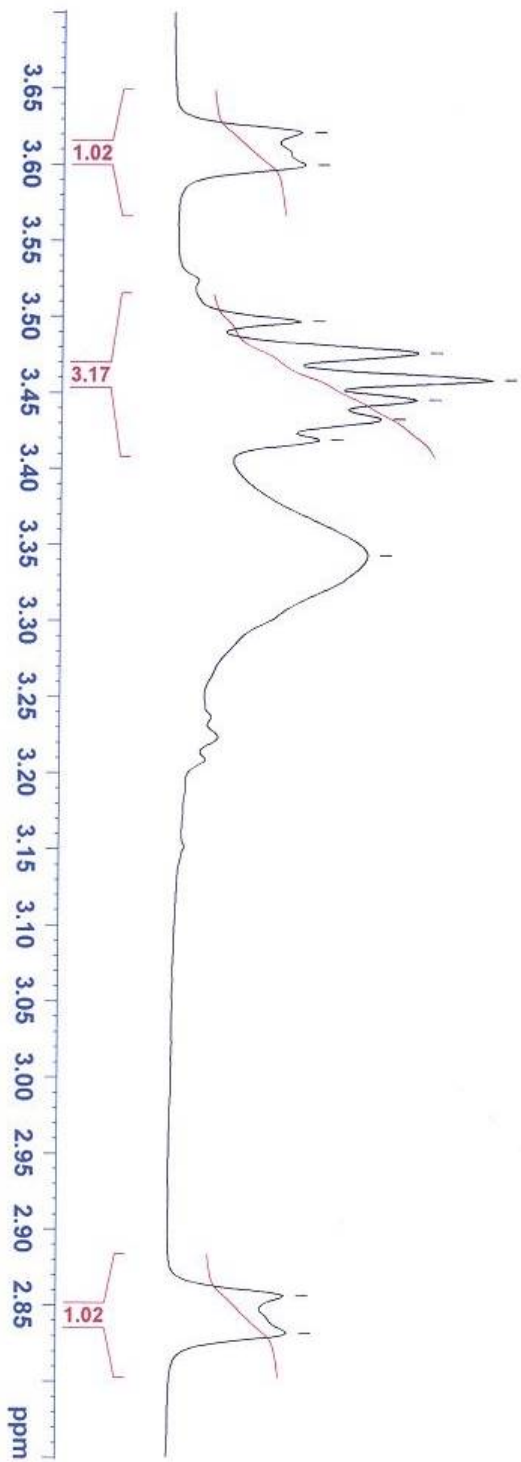

TAZEEN/DR. A. HAMED/DBD-C5-F/DMSO  
1H

— 3.622  
— 3.600

— 3.498  
— 3.477  
— 3.460  
— 3.446  
— 3.434  
— 3.420

— 3.344

— 2.857  
— 2.833

## Supplementary Information (SI)

Data File C:\CHEM32\1\DATA\22-07-2013\SIGN000018.D  
Sample Name: DBU\_C5\_

```
=====
Acq. Operator   : hameed
Acq. Instrument : Instrument 1                Location : Vial 1
Injection Date  : 10/28/2014 9:59:14 AM      Inj Volume : 1.000 µl
Acq. Method     : C:\CHEM32\1\METHODS\KINETIC.M
Last changed    : 10/28/2014 9:57:24 AM by hameed
                  (modified after loading)
Analysis Method : C:\CHEM32\1\METHODS\KINETIC.M
Last changed    : 10/28/2014 10:19:18 AM by hameed
                  (modified after loading)
Method Info     : IONICLIQUIDS
Sample Info     : DBU_C5_
=====
```

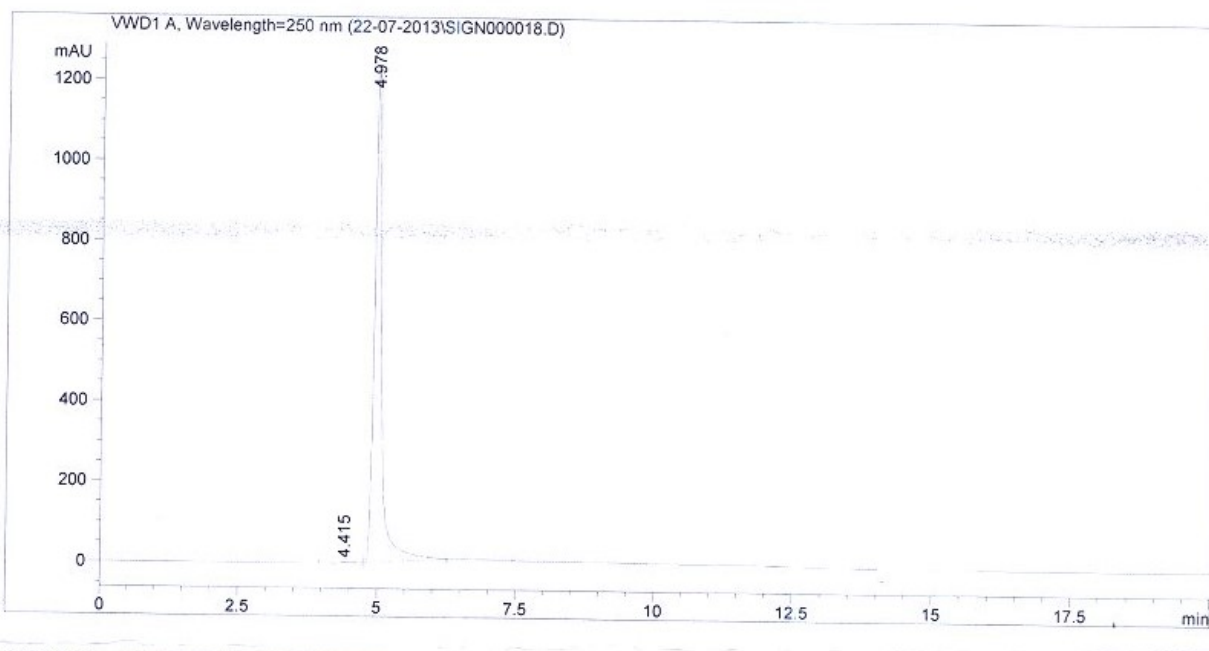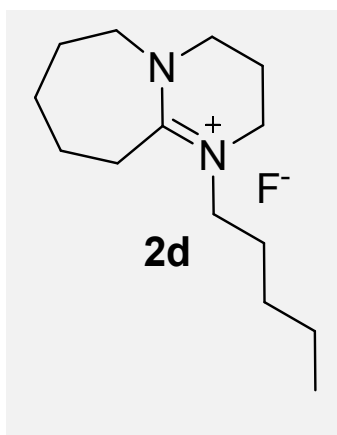

TAZEEN/DR.A.HAMEED/AAC7F/DMSO  
<sup>1</sup>H

AVANCE AV-400 MHZ  
 Lab # 115

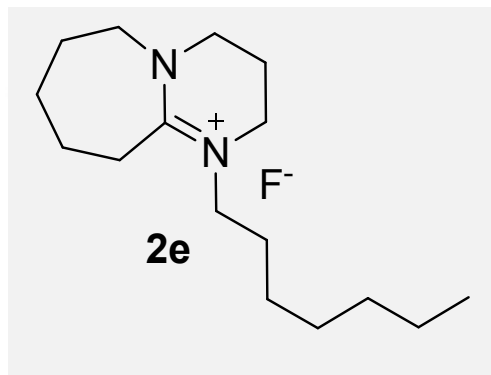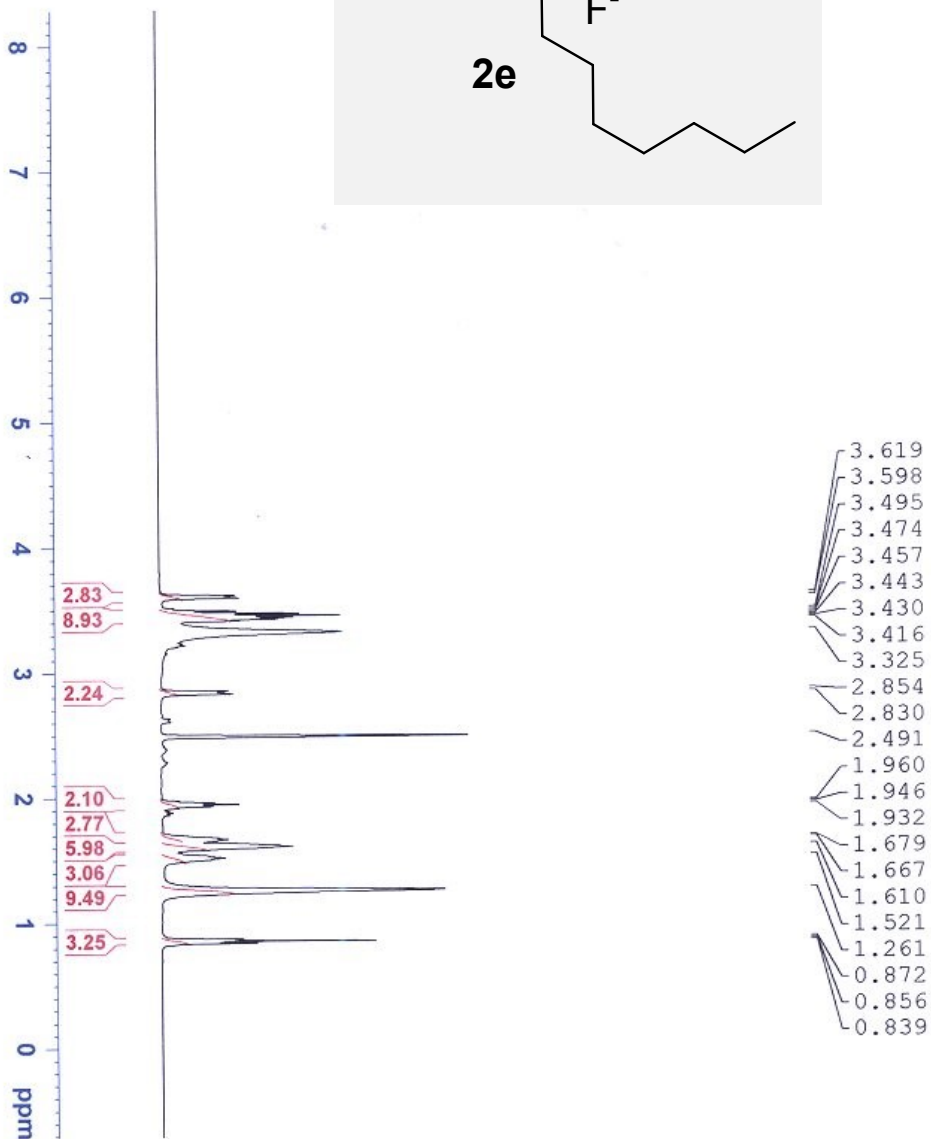

```

NAME          oct24-14
EXPNO         2
PROCNO        1
Date_         20141024
Time          11.31
INSTRUM       spect
PROBHD        5 mm SEI 1H-13
PULPROG       zg30
TD            32768
SOLVENT       DMSO
NS            32
DS            0
SWH            8012.820 Hz
FIDRES        0.244532 Hz
AQ            2.0447731 sec
RG            90.5
DE            62.400 usec
TE            300.0 K
D1            1.50000000 sec
TD0           1

===== CHANNEL f1 =====
NUC1          1H
P1            10.80 usec
PL1           3.00 dB
SFO1          400.032002 KHz
SI            16384
SF            400.0300041 KHz
WDW           EM
SSB           0
GB            0
PC            0.30 Hz
  
```



Supplementary Information (SI)

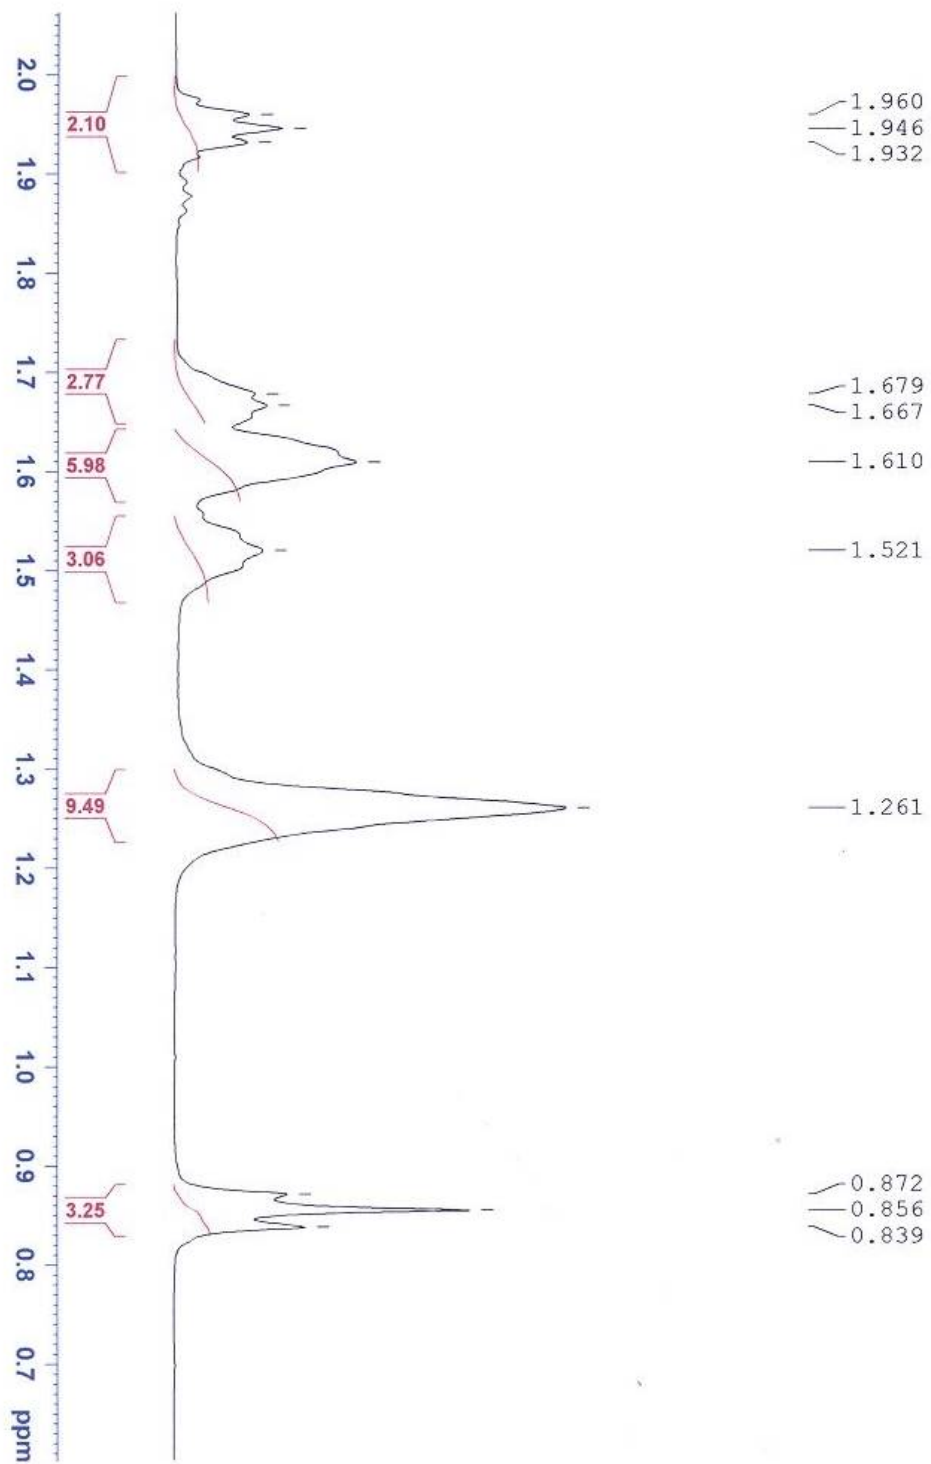

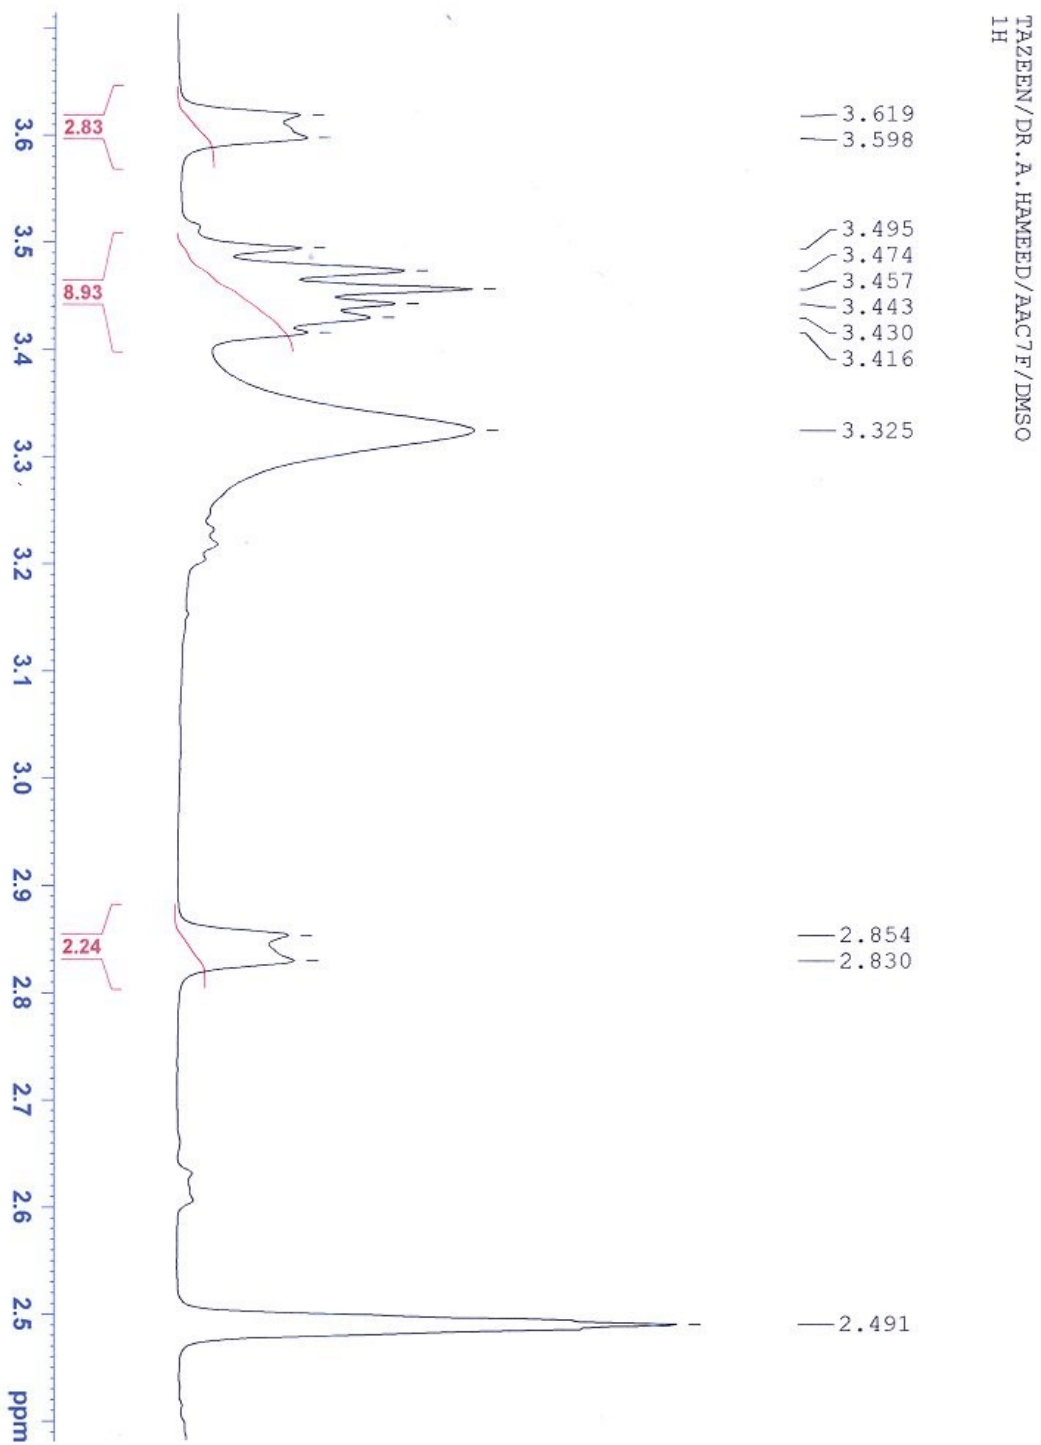

# Supplementary Information (SI)

Data File C:\CHEM32\1\DATA\22-07-2013\SIGN000013.D  
Sample Name: DBU\_C7

=====  
Acq. Operator : hameed  
Acq. Instrument : Instrument 1 Location : Vial 1  
Injection Date : 10/24/2014 3:36:37 PM Inj Volume : 1.000 µl  
Acq. Method : C:\CHEM32\1\METHODS\KINETIC.M  
Last changed : 10/24/2014 3:34:10 PM by hameed  
(modified after loading)  
Analysis Method : C:\CHEM32\1\METHODS\KINETIC.M  
Last changed : 10/24/2014 3:56:42 PM by hameed  
(modified after loading)  
Method Info : IONICLIQUIDS  
Sample Info : C-7\_DBU

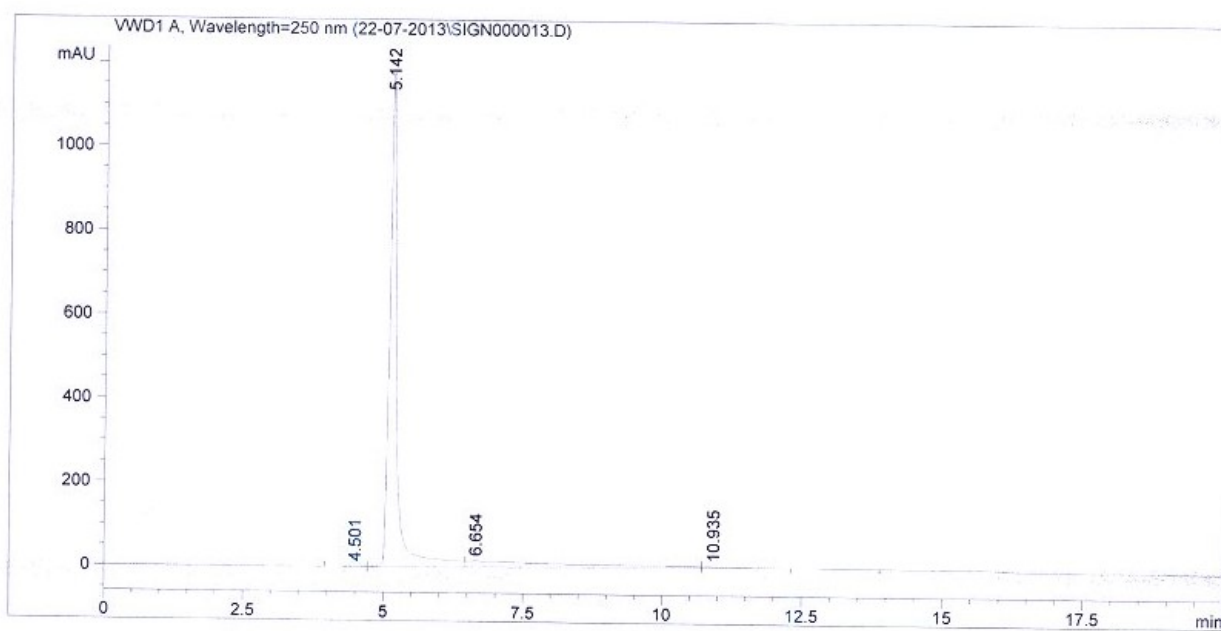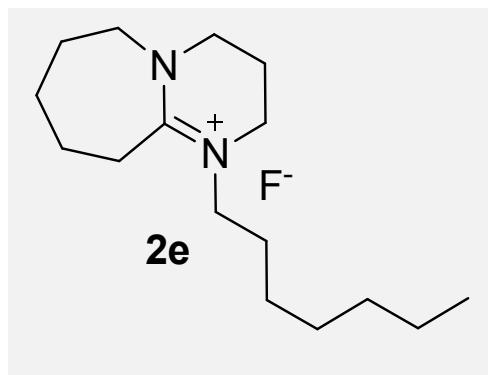



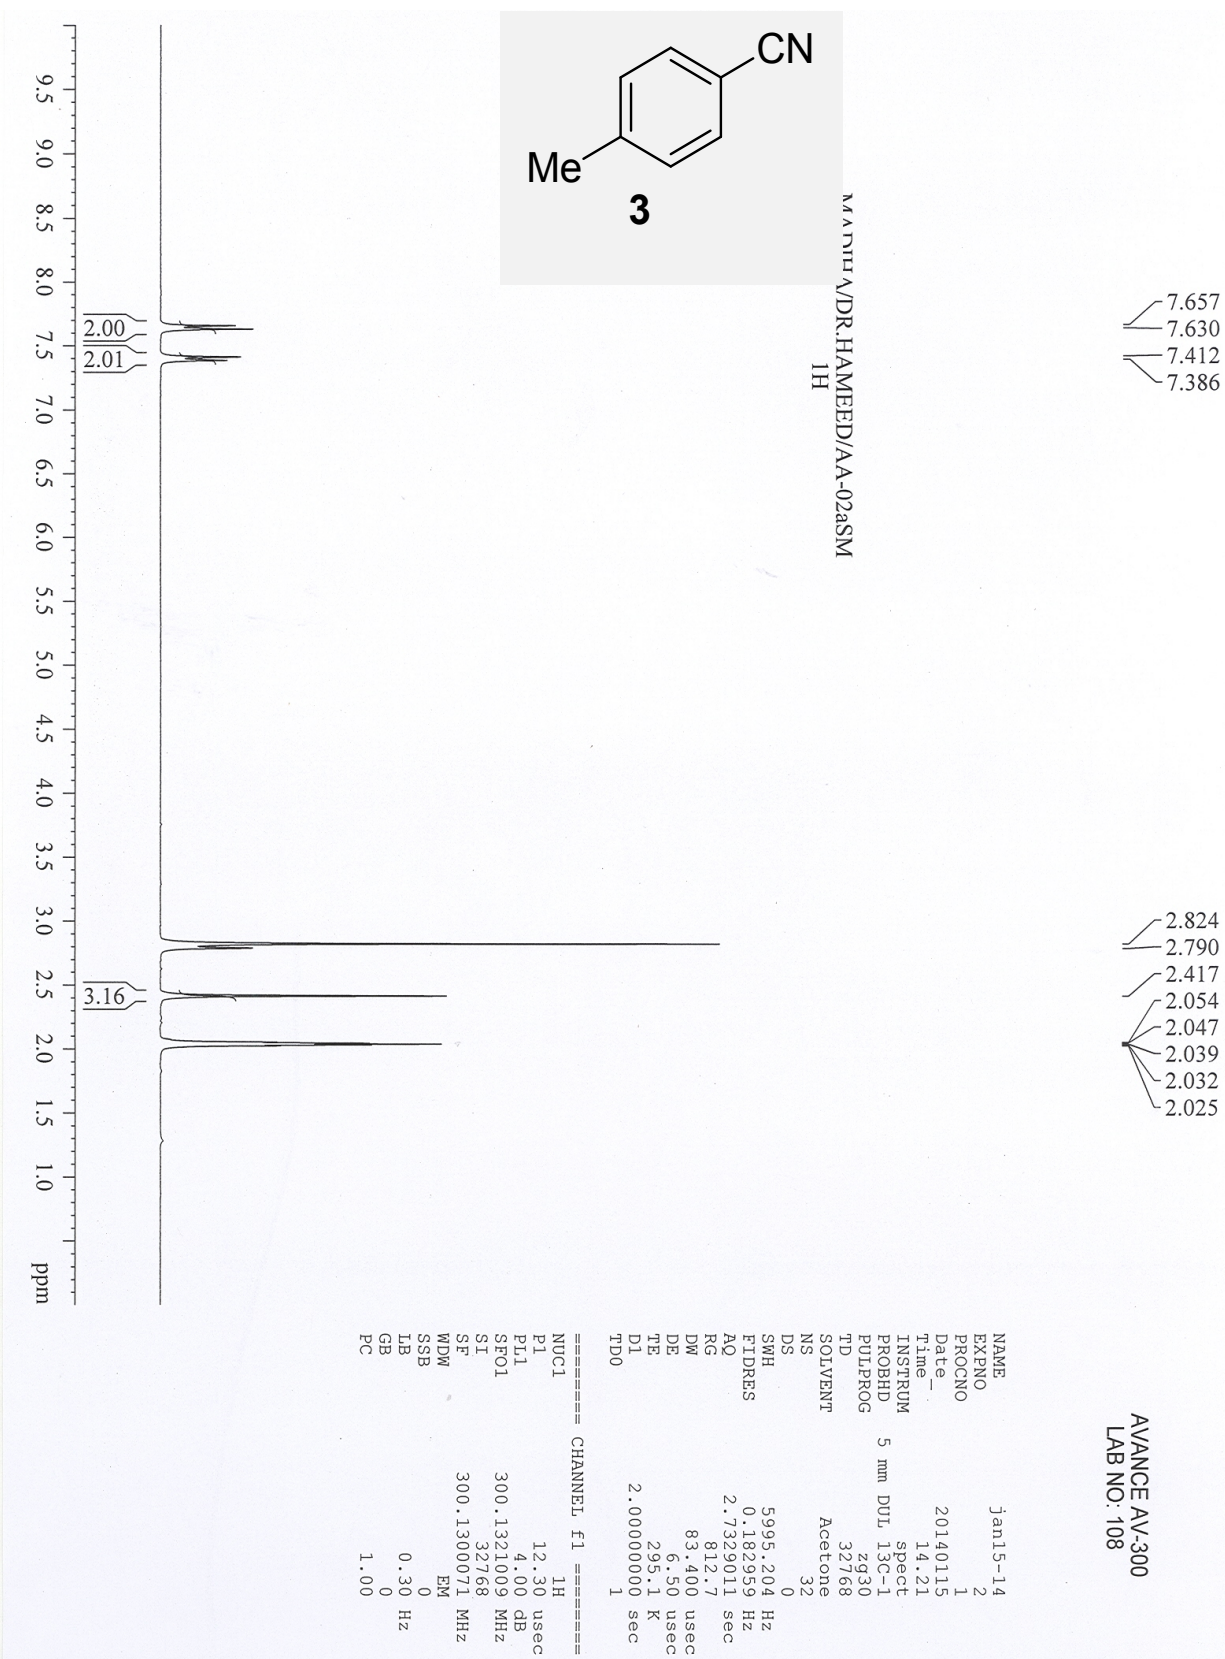

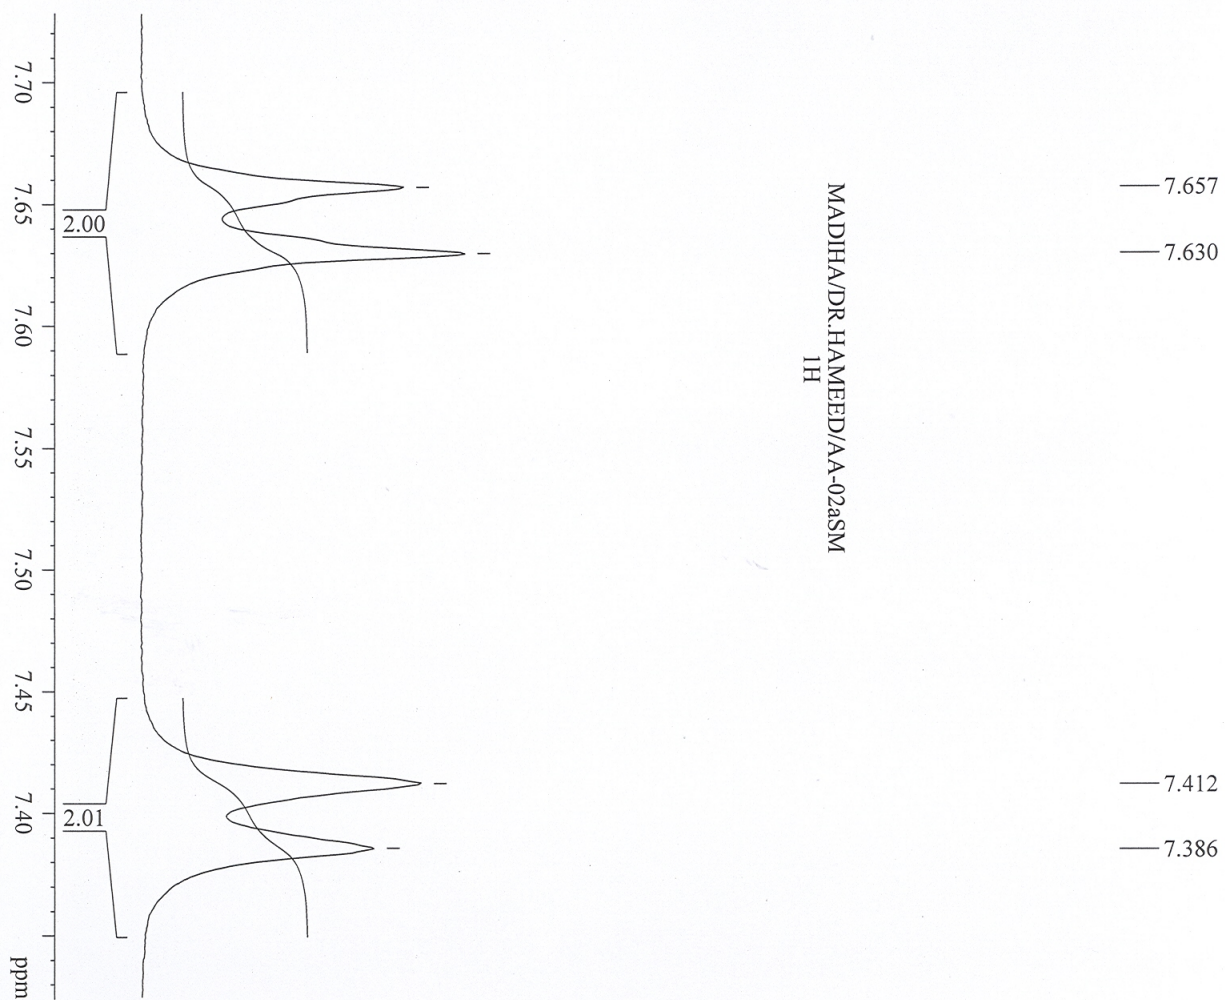



ALI ANUS/DR, FATIMA B/AA-40A/ICCBS U.O.K/

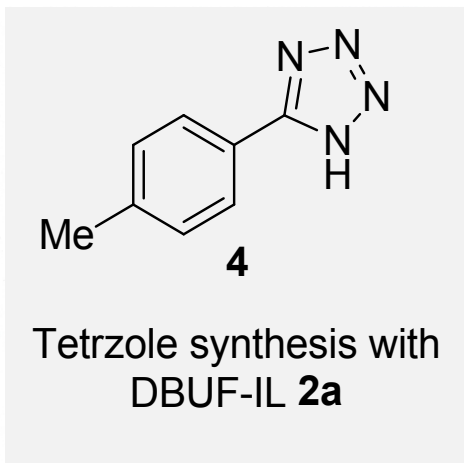

7.926  
 7.906  
 7.409  
 7.389

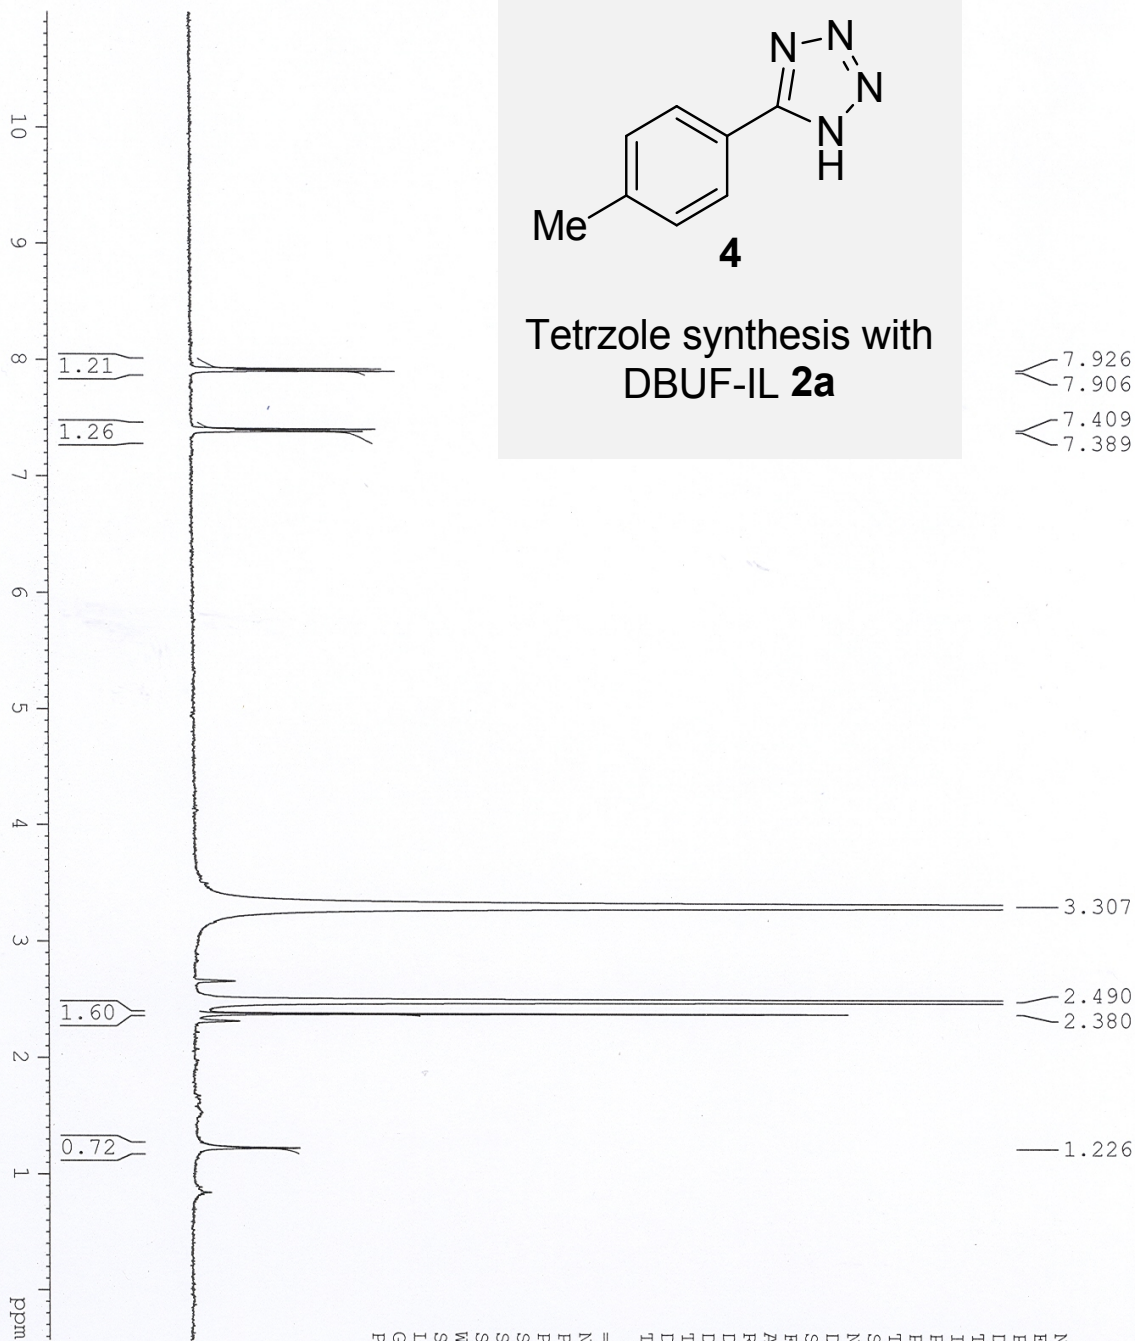

```

===== CHANNEL F1 =====
NAME          may21-14
EXPNO         1
PROCNO        1
Date_         20140521
Time_         11.58
INSTRUM       spect
PROBHD        5 mm DUL 13C-1
PULPROG       zg30
TD            32768
SOLVENT       DMSO
NS            64
DS            0
SWH           8012.820 Hz
FIDRES        0.244532 Hz
AQ            2.0447731 sec
RG            2048
DE            62.400 usec
TE            300.0 K
D1            2.000000000 sec
TD0           1

===== CHANNEL F1 =====
NUC1          1H
P1            10.20 usec
PL1           0.00 dB
SFO1          400.1332010 MHz
SI            16384
SF            400.1300064 MHz
WDW           EM
SSB           0
LB            0.30 Hz
GB            0
PC            1.00
  
```

AVANCE 400  
 LAB NO 117



Supplementary Information (SI)

ALI ANUS/DR, FATIMA B/AA-40A/ICCBS U.O.K/

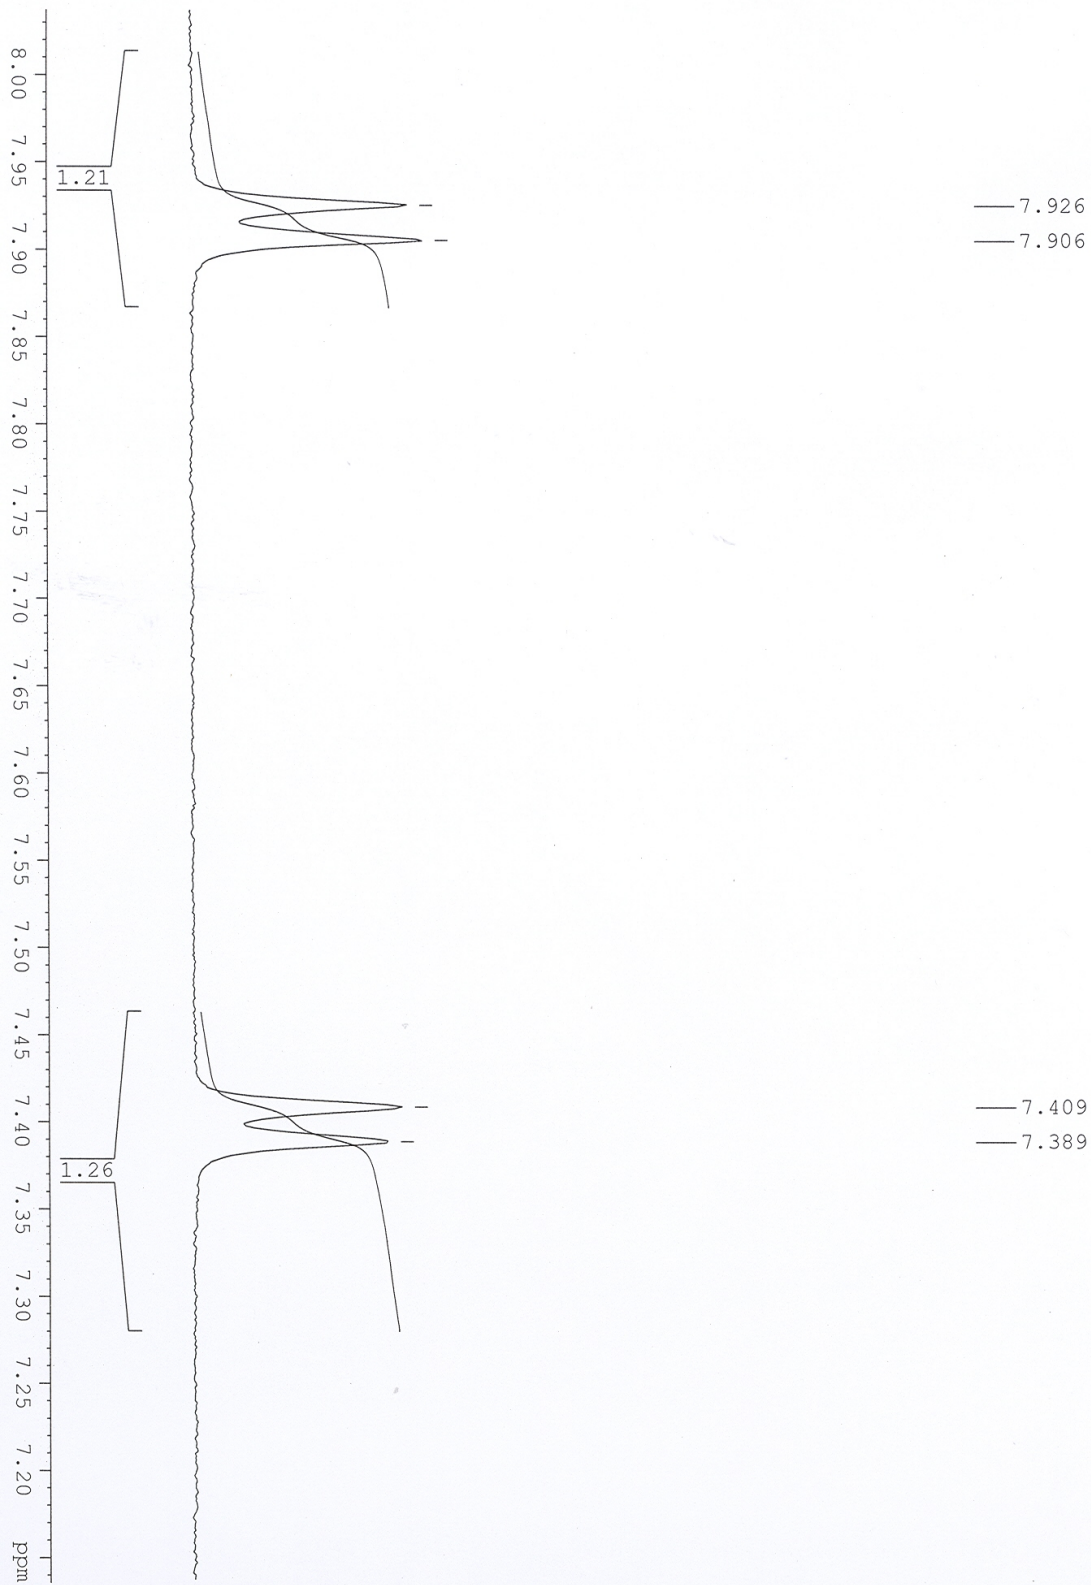

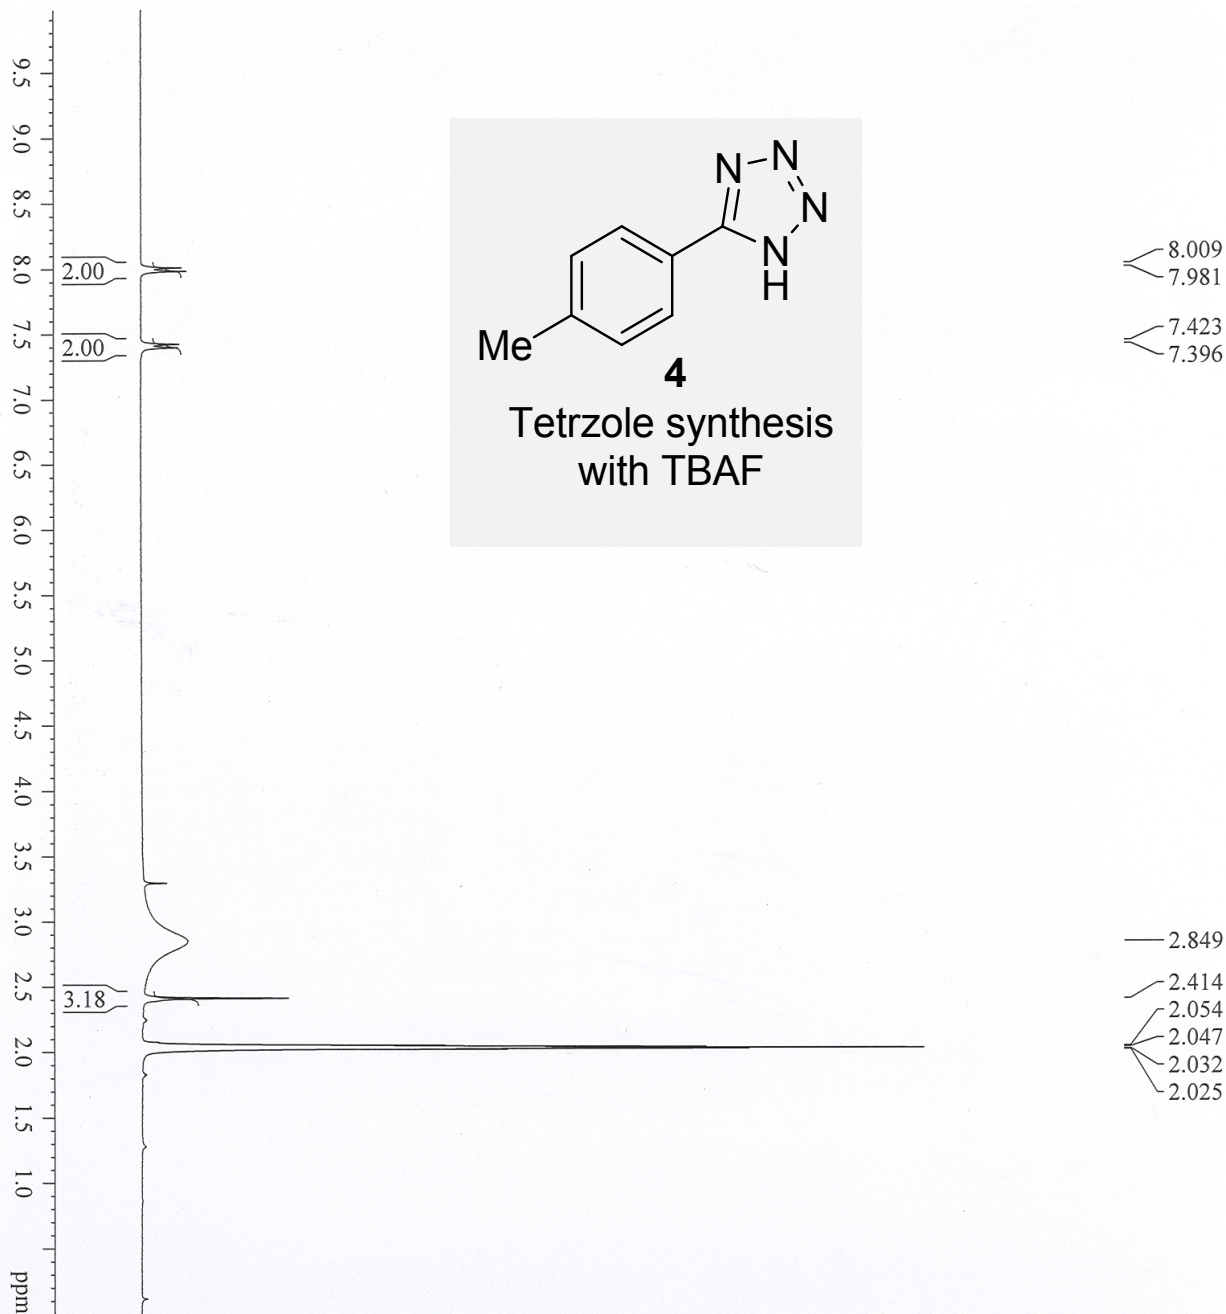

8.009  
7.981  
7.423  
7.396

2.849  
2.414  
2.054  
2.047  
2.032  
2.025

AVANCE AV-300  
LAB NO: 108

```

===== CHANNEL f1 =====
NAME          Jan15-14
EXPNO         3
PROCNO        1
Date_         20140115
Time         14.34
INSTRUM       spect
PROBHD        5 mm DUL 13C-1
PULPROG       zgpg30
TD            2930
SOLVENT       Acetone
NS            64
DS            0
SWH           5995.204 Hz
FIDRES        0.182959 Hz
AQ            2.7329011 sec
RG            812.7
DE            6.50 usec
TE            295.1 K
D1            2.00000000 sec
TD0           1

===== CHANNEL f1 =====
NUC1          1H
P1            12.30 usec
PL1           4.00 dB
SFO1          300.1321009 MHz
SI            32768
SF            300.1300071 MHz
WDW           EM
SSB           0
LB            0.30 Hz
GB            0
PC            1.00
  
```



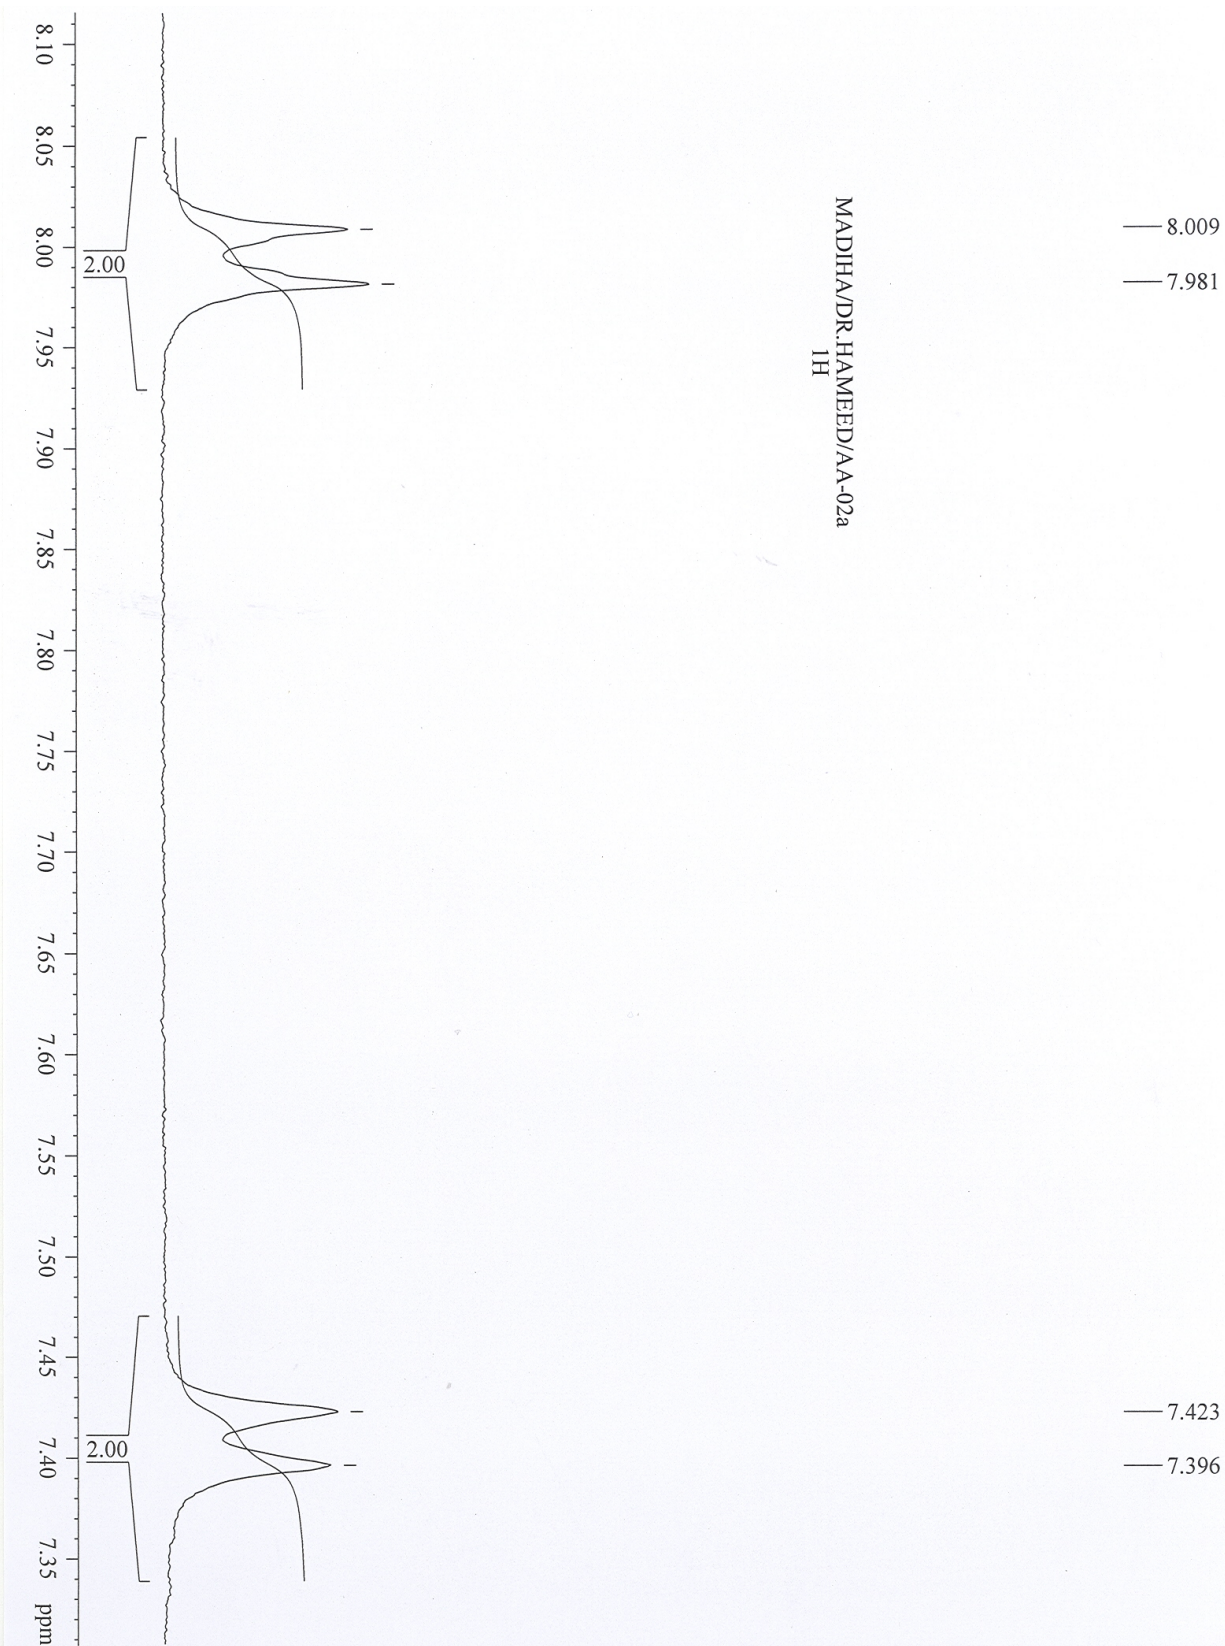

Supplement: c4ra13393e1.pdf [file c4ra13393e1.pdf]
